# Supplementary material
Source: PubMed Central journal article supplement (PMC7863679)
Supplement: aim-olf-M206739-M20-6739_Supplement.pdf [file aim-olf-M206739-M20-6739_Supplement.pdf]

## Supplementary Material\*

Al-Samkari H, Gupta S, Karp Leaf R, et al. Thrombosis, Bleeding, and the Observational Effect of Early Therapeutic Anticoagulation on Survival in Critically Ill Patients With COVID-19. *Ann Intern Med*. 2021. [Epub ahead of print]. doi:10.7326/M20-6739

### *Supplement.* **Supplementary Materials**

\* This supplementary material was provided by the authors to give readers further details on their article. The material was reviewed but not copyedited.

|                                                                                                                                                             |              |
|-------------------------------------------------------------------------------------------------------------------------------------------------------------|--------------|
| <b>STOP-COVID Investigators .....</b>                                                                                                                       | <b>3-6</b>   |
| <b>Supplemental Methods.....</b>                                                                                                                            | <b>7-9</b>   |
| <b>Supplemental Tables .....</b>                                                                                                                            | <b>10-16</b> |
| Table 1. List of Participating Sites.....                                                                                                                   | 10           |
| Table 2. Definitions of Baseline Characteristics, Comorbidities, Treatments, and Outcomes .....                                                             | 11-12        |
| Table 3. Complete List of Patient Characteristics at Baseline .....                                                                                         | 13-14        |
| Table 4. Anticoagulants Used in Patients Treated with Therapeutic Anticoagulation. ....                                                                     | 15           |
| Table 5. Indications for Initiation of Therapeutic Anticoagulation in First Two Days of ICU Admission for Patients Included in Target Trial Emulation ..... | 16           |
| <b>Supplemental Figures.....</b>                                                                                                                            | <b>17-20</b> |
| Figure 1. Number of Cohort Patients by City Among Contributing Sites .....                                                                                  | 17           |
| Figure 2. Cumulative incidence of VTE, Major Bleeding, Therapeutic Anticoagulation; Multivariable Model for VTE.. ....                                      | 18           |
| Figure 3. Interhospital Variation in Incidence of VTE and the Use of Therapeutic Anticoagulation .....                                                      | 19           |
| Figure 4. Rates of VTE by Sex Across Categories of BMI and D-dimer .....                                                                                    | 20           |
| Figure 5. Standardized Differences Before and After Applying Inverse Probability of Treatment Weighting .....                                               | 21           |
| <b>Supplemental References .....</b>                                                                                                                        | <b>22</b>    |
| <b>Case Report Form .....</b>                                                                                                                               | <b>23</b>    |

## **STOP-COVID INVESTIGATORS**

*Unless also in the author byline, the investigators listed below contributed to the manuscript but did not author it.*

**Baylor College of Medicine:** Carl P. Walther\*, Samaya J. Anumudu

**Baylor University Medical Center:** Justin Arunthamakun\*, Kathleen F. Kopecky, Gregory P. Milligan, Peter A. McCullough, Thuy-Duyen Nguyen

**Beth Israel Deaconess Medical Center:** Shahzad Shaefi\*, Megan L. Krajewski, Sidharth Shankar, Aameka Pannu, Juan D. Valencia, Kenneth A. Bauer

**Boston Medical Center:** Sushrut S. Waikar\*, Zoe A. Kibbelaar

**Cook County Health:** Ambarish M. Athavale\*, Peter Hart, Shristi Upadhyay, Ishaan Vohra, Ajiboye Oyintayo

**Cooper University Health Care:** Adam Green\*, Jean-Sebastien Rachoin, Christa A. Schorr, Lisa Shea

**Duke University Medical Center:** Daniel L. Edmonston\*, Christopher L. Mosher

**Hackensack Meridian Health Mountainside Medical Center:** Alexandre M. Shehata\*, Zaza Cohen, Valerie Allusson, Gabriela Bambrick-Santoyo, Noor ul aain Bhatti, Bijal Mehta, Aquino Williams

**Hackensack Meridian Health Hackensack University Medical Center:** Samantha K. Brenner\*, Patricia Walters, Ronaldo C. Go, Keith M. Rose

**Harvard T.H. Chan School of Public Health:** Miguel A. Hernán

**Harvard University:** Amy M. Zhou, Ethan C. Kim, Rebecca Lisk

**Icahn School of Medicine at Mount Sinai:** Lili Chan\*, Kusum S. Mathews\*, Steven G. Coca, Deena R. Altman, Aparna Saha, Howard Soh, Huei Hsun Wen, Sonali Bose, Emily A. Leven, Jing G. Wang, Gohar Mosoyan, Pattharawin Pattharanitima, Emily J. Gallagher

**Indiana University School of Medicine/Indiana University Health:** Allon N. Friedman\*, John Guirguis, Rajat Kapoor, Christopher Meshberger, Katherine J. Kelly

**Johns Hopkins Hospital:** Chirag R. Parikh\*, Brian T. Garibaldi, Celia P. Corona-Villalobos, Yumeng Wen, Steven Menez, Rubab F. Malik, Carmen Elena Cervantes, Samir C. Gautam

**Kings County Hospital Center:** Mary C. Mallappallil\*, Jie Ouyang, Sabu John, Ernie Yap, Yohannes Melaku, Ibrahim Mohamed, Siddhartha Bajracharya, Isha Puri, Mariah Thaxton, Jyotsna Bhattacharya, John Wagner, Leon Boudourakis

**Loma Linda University:** H. Bryant Nguyen\*, Afshin Ahouhim

**Mayo Clinic, Arizona:** Leslie F. Thomas\*, Dheeraj Reddy Sirganagari

**Mayo Clinic, Florida:** Pramod K. Guru\*

**Medical College of Wisconsin:** Yan Zhou,\* Paul A. Bergl, Jesus Rodriguez, Jatan A. Shah, Mrigank S. Gupta

**MedStar Georgetown University Hospital:** Princy N. Kumar\*, Deepa G. Lazarous, Seble G. Kassaye

**Montefiore Medical Center/Albert Einstein College of Medicine:** Michal L. Melamed\*, Tanya S. Johns. Ryan Mocerino, Kalyan Prudhvi, Denzel Zhu, Rebecca V. Levy, Yorg Azzi, Molly Fisher, Milagros Yunes, Kaltrina Sedaliu, Ladan Golestaneh, Maureen Brogan, Jyotsana Thakkar, Neelja Kumar, Michael J. Ross, Michael Chang

**New York-Presbyterian Queens Hospital:** Ritesh Raichoudhury\*, Akshay Athreya, Mohamed Farag

**New York-Presbyterian/Weill Cornell Medical Center:** Edward J. Schenck\*, Soo Jung Cho, Maria Plataki, Sergio L. Alvarez-Mulett, Luis G. Gomez-Escobar, Di Pan, Stefi Lee, Jamuna Krishnan, William Whalen

**New York University Langone Hospital:** David Charytan\*, Ashley Macina

**Northwestern Memorial Hospital:** Northwestern University Feinberg School of Medicine - Anand Srivastava\*, Alexander S. Leidner, Carlos Martinez, Jacqueline M. Kruser, Richard G. Wunderink, Alexander J. Hodakowski

**Ochsner Medical Center:** Juan Carlos Q. Velez\*, Eboni G. Price-Haywood, Luis A. Matute-Trochez, Anna E. Hasty, Muner MB. Mohamed

**Oregon Health and Science University Hospital:** Rupali S. Avasare\*, David Zonies\*

**Partners Healthcare:** Brigham and Women's Hospital, Brigham and Women's Faulkner Hospital, Massachusetts General Hospital, and Newton Wellesley Hospital – David E. Leaf\*, Shruti Gupta\*, Hanny Al-Samkari, Rebecca Karp Leaf, Rachel Rosovsky, Meghan E. Sise, Erik T. Newman, Samah Abu Omar, Kapil K. Pokharel, Shreyak Sharma, Harkarandeep Singh, Simon Correa, Tanveer Shaikat, Omer Kamal, Wei Wang, Meghan Lee, Ian A. Strohbehm, Jiahua Li, Ariel L. Mueller

**ProMedica Health System:** Roberta E. Redfern,\* Nicholas S. Cairl, Gabriel Naimy, Abeer Abu-Saif, Danyell Hall, Laura Bickley

**Renown Health:** Chris Rowan\*, Farah Madhani-Lovely\*

**Rush University Medical Center:** Vasil Peev\*, Jochen Reiser, John J. Byun, Andrew Vissing, Esha M. Kapania, Zoe Post, Nilam P. Patel, Joy-Marie Hermes

**Rutgers/New Jersey Medical School:** Anne K. Sutherland\*, Ameer Patrawalla, Diana G. Finkel, Barbara A. Danek, Sowminya Arikapudi, Jeffrey M. Paer, Peter Cangialosi, Mark Liotta

**Rutgers/Robert Wood Johnson Medical School:** Jared Radbel\*, Sonika Puri, Jag Sunderram, Matthew T. Scharf, Ayesha Ahmed, Ilya Berim, Jayanth S. Vatson, George Karp

**Stanford Healthcare:** Stanford University School of Medicine – Shuchi Anand\*, Joseph E. Levitt, Pablo Garcia

**Temple University Hospital:** Suzanne M. Boyle\*, Rui Song

**Thomas Jefferson University Hospital:** Jingjing Zhang\*, Sang Hoon Woo, Xiaoying Deng, Goni Katz-Greenberg

**Tulane Medical Center:** Moh'd A. Sharshir\*, Vadym V. Rusnak

**United Health Services Hospitals:** Muhammad Imran Ali

**University of Colorado Anschutz Medical Campus:** Anip Bansal\*, Amber S. Podoll, Michel Chonchol, Sunita Sharma, Ellen L. Burnham

**University Hospitals Cleveland Medical Center:** Arash Rashidi\*, Rana Hejal

**University of Alabama-Birmingham Hospital:** Eric Judd\*, Laura Latta, Ashita Tolwani

**University of California-Davis Medical Center:** Timothy E. Albertson\*, Jason Y. Adams

**University of California-Los Angeles Medical Center:** Ronald Reagan-UCLA Medical Center - Steven Y. Chang\*, Rebecca M. Beutler; Santa Monica-UCLA Medical Center – Carl E. Schulze

**University of California-San Diego Medical Center:** Etienne Macedo\*, Harin Rhee

**University of California-San Francisco Medical Center:** Kathleen D. Liu\*, Vasantha K. Jotwani

**University of Chicago Medical Center:** Jay L. Koyner\*

**University of Florida Health-Gainesville:** Chintan V. Shah\*

**University of Florida-Health-Jacksonville:** Vishal Jaikaransingh\*

**University of Illinois Hospital and Health Sciences System:** Stephanie M. Toth-Manikowski\*, Min J. Joo\*, James P. Lash

**University of Kentucky Medical Center:** Javier A. Neyra\*, Nourhan Chaaban, Madona Elias, Yahya Ahmad

**University Medical Center of Southern Nevada:** Rajany Dy\*, Alfredo Iardino, Elizabeth H. Au, Jill H. Sharma

**University of Miami Health System:** Marie Anne Sosa\*, Sabrina Taldone, Gabriel Contreras, David De La Zerda, Hayley B. Gershengorn, Alessia Fornoni

**University of Michigan:** Salim S. Hayek\*, Penelope Blakely, Hanna Berlin, Tariq U. Azam, Husam Shadid, Michael Pan, Patrick O' Hayer, Chelsea Meloche, Rafey Feroze, Kishan J. Padalia, Jeff Leya, John P. Donnelly, Andrew J. Admon

**University of North Carolina School of Medicine:** Jennifer E. Flythe\*, Matthew J. Tugman, Emily H. Chang

**University of Oklahoma Health Sciences Center:** Brent R. Brown\*

**University of Pennsylvania Health System:** Amanda K. Leonberg-Yoo\*, Ryan C. Spiardi, Todd A. Miano, Meaghan S. Roche, Charles R. Vasquez

**University of Pittsburgh Medical Center:** Amar D. Bansal\*, Natalie C. Ernecoff, Sanjana Kapoor, Siddharth Verma, Huiwen Chen

**University of Tennessee Health Science Center and Memphis VA Medical Center/Methodist University Hospital –** Csaba P. Kovcsy\*, Miklos Z. Molnar\*, Ambreen Azhar

**University of Texas Southwestern Medical Center and Parkland Health and Hospital System:** S. Susan Hedayati\*, Mridula V. Nadamuni, Shani Shastri, Duwayne L. Willett

**University of Vermont Larner College of Medicine:** Samuel A.P. Short

**University of Virginia Health System:** Amanda D. Renaghan\*, Kyle B. Enfield

**University of Washington Medical Center:** Pavan K. Bhatraju\*, A. Bilal Malik

**Vanderbilt University Medical Center:** Matthew W. Semler

**Washington University in St. Louis/Barnes Jewish Hospital:** Anitha Vijayan\*, Christina Mariyam Joy, Tingting Li, Seth Goldberg, Patricia F. Kao

**Wellforce Health System:** Lowell General Hospital - Greg L. Schumaker\*, Tufts Medical Center - Nitender Goyal\*, Anthony J. Faugno, Greg L. Schumaker, Caroline M. Hsu, Asma Tariq, Leah Meyer, Ravi K. Kshirsagar, Daniel E. Weiner

**Westchester Medical Center:** Marta Christov\*, Jennifer Griffiths, Sanjeev Gupta, Aromma Kapoor, Savneek Chugh

**Yale School of Medicine:** Perry Wilson,\* Tanim Arora, Ugochukwu Ugwuowo

\*Site Principal Investigator

## **SUPPLEMENTAL METHODS**

### **Data Collection and Validation**

Data were collected using REDCap, a secure, HIPAA-compliant, web-based application. Wherever possible, data were captured using checkboxes rather than manual entry to minimize keystroke errors. For data that required keystroke entry (e.g., laboratory values), we implemented validation ranges to flag potential errors in real-time. For example, blank values for required fields, field validation errors (incorrect data type), field validation errors (out of range), outliers for numerical fields, multiple choice fields with invalid values (e.g., if a user selected “none of the above” while also selecting one of the other choices), and errors in dates were all flagged in real time using REDCap’s Data Quality module. Outliers for numerical fields were also validated manually by confirming the values with the data collector. Finally, after collection, all data were again manually reviewed, and values that appeared incongruent or out of range were manually validated by confirming the accuracy of the data with the collaborator who entered it.

### **Multivariable Modeling of Predictors of VTE**

We performed multivariable logistic regression modeling to estimate the association between prespecified variables of interest and radiographically-confirmed venous thromboembolism (VTE). The following variables were included in the multivariable model based on clinical knowledge and biologic plausibility:

1. Age (years): 18-39, 40-59, 60-79,  $\geq 80$
2. Male sex
3. Body mass index ( $\text{kg}/\text{m}^2$ ):  $< 30$ , 30-39.9,  $\geq 40$
4. Active malignancy
5. Current smoker
6. Shock on ICU Day 1, defined as the requirement for  $\geq 2$  vasopressors
7. Respiratory failure (requirement for mechanical ventilation) on ICU day 1
8. Leukocyte count (per  $\text{mm}^3$ ) on ICU day 1:  $< 11,000$ ,  $\geq 11,000$  per  $\text{mm}^3$
9. Platelet count ( $\times 10^9$  cells/L) on ICU day 1:  $< 350$ ,  $\geq 350 \times 10^9$  cells/L
10. Receipt of therapeutic anticoagulation on ICU day 1
11. Receipt of aspirin on ICU day 1
12. D-dimer ( $\text{ng}/\text{mL}$ ) on ICU day 1:  $\leq 1,000$ , 1,001-2,500, 2,501-10,000,  $> 10,000$

The primary outcome was radiographically-confirmed VTE (deep vein thrombosis or pulmonary embolism) in the 14 days following ICU admission. Missing data were multiply imputed with five datasets, and results were pooled using Rubin’s rules.<sup>1</sup>

### **Target Trial Specification**

We sought to emulate a hypothetical randomized clinical trial in which eligible patients were adults ( $\geq 18$  years old) with laboratory-confirmed COVID-19 who were admitted to a participating intensive care unit (ICU) between March 4 and April 11, 2020. We excluded patients if they were receiving anticoagulation prior to hospitalization, or if they had any of the following within the first two days of ICU admission: confirmed or suspected VTE; extracorporeal membrane oxygenation; major bleeding event; or a platelet count less than  $50 \times 10^9$  cells/L.

Patients were categorized according to receipt or no receipt of therapeutic anticoagulation within the first two days of ICU admission. ICU day 1 was defined as the 24-hour period spanning from midnight to midnight on the day of ICU admission. Day 2 was defined as the subsequent 24-hour period following ICU day 1. Patients who initiated therapeutic anticoagulation after day 2

were categorized in the control group, in keeping with an intention-to-treat approach. Patients were followed until the first of hospital discharge, death, or May 8<sup>th</sup>, 2020 – the date on which the study database for the current analysis was locked. Thus, all patients who remained hospitalized at the time of analysis had a minimum of 28 days of follow-up.

The primary analysis compares the survival among patients who received or did not receive therapeutic anticoagulation in the first two days of ICU admission. Survival time was defined as the interval from ICU admission to death, censored at hospital discharge or the end of follow-up, whichever occurred first. Hazard ratios and 95% confidence intervals (CIs) were estimated using a Cox model.

### **Inverse probability weighting (IPW)**

We adjusted for confounding using IPW. We fit a logistic regression model with initiation of therapeutic anticoagulation as the outcome conditional on the covariates listed below. These covariates were prespecified based on clinical judgment, as they were thought to be potentially associated with a clinician's decision to initiate treatment with therapeutic anticoagulation and with survival. We used these predicted probabilities to calculate stabilized inverse probability weights.<sup>2</sup> We used a robust (sandwich) variance estimator to account for potential replications of patients induced by IPW, which results in conservative 95% CIs. We evaluated standardized differences across each measured covariate before and after applying the weighting (**Figure 5**).

### **Sensitivity analyses**

We conducted five sensitivity analyses of the target trial emulation. First, we included the covariates above in an unweighted Cox model. Second, to eliminate the potential for immortal time bias (20, 21), we categorized eligible individuals into either the early therapeutic anticoagulation group or no early therapeutic anticoagulation group on ICU day 1, and we repeated the process for eligible individuals on ICU day 2. Our final estimates were obtained by pooling the data from the nested target trials on ICU days 1 and 2, using inverse probability weighting as described herein. Third, we repeated the primary target trial, but extended the exposure period for initiation of therapeutic anticoagulation from the first 2 days to the first 3 days following ICU admission. Fourth, we stratified the Cox model by site. Fifth, rather than censoring patients at hospital discharge, we kept them in the risk set until May 8, 2020, the date of last follow-up.

### **Subgroup analyses**

We used similar methods as the primary analysis above to estimate the effect of early therapeutic anticoagulation on survival across the following prespecified subgroups: age ( $\leq 60$  vs.  $> 60$  years); sex; body mass index ( $< 40$  vs.  $\geq 40$  kg/m<sup>2</sup>); days from symptom onset to ICU admission ( $\leq 3$  vs.  $> 3$ ); receipt of invasive mechanical ventilation, shock, and PaO<sub>2</sub>:FiO<sub>2</sub> ratio ( $< 100$ , 100-199, and  $\geq 200$  or not mechanically ventilated) on ICU day 1; D-dimer level on ICU days 1 or 2 ( $\leq 1000$ , 1001-2500, and  $> 2500$  ng/mL); and number of pre-COVID ICU beds ( $< 50$ , 50-99, and  $\geq 100$ ).

### **Covariates included in IPW modeling**

#### Baseline covariates

Age: 18-39; 40-59; 60-79;  $\geq 80$

Male sex

Race: white versus non-white (including other/unknown)

Ethnicity: non-Hispanic versus Hispanic/Unknown

Body mass index (kg/m<sup>2</sup>):  $< 30$ ; 30-39.9;  $\geq 40$ ; missing



Hypertension  
 Diabetes mellitus  
 Atrial fibrillation/flutter  
 Coronary artery disease  
 Congestive heart failure  
 Current smoker  
 Active malignancy  
 Days from symptom onset to ICU admission: 0 to 3; >3

Severity-of-illness covariates assessed on ICU admission

PaO<sub>2</sub>:FiO<sub>2</sub> (P/F) ratio on ICU day 1 as follows: not ventilated; ventilated and P/F ratio ≥200; ventilated and P/F ratio <200; ventilated and P/F ratio missing  
 Shock on ICU day 1: ≥2 vasopressors versus <2 vasopressors  
 Renal, liver, and coagulation components of the Sequential Organ Failure Assessment (SOFA) score on ICU day 1:<sup>3</sup>

|                                                        | Categories         |                        |                                                    |
|--------------------------------------------------------|--------------------|------------------------|----------------------------------------------------|
|                                                        | 0 <sup>a</sup>     | 1                      | 2 <sup>b</sup>                                     |
| SOFA Renal                                             | Cr<1.2 and UOP≥500 | Cr 1.2-1.9 and UOP≥500 | Cr ≥2 or UOP<500 <sup>c</sup> or acute RRT or ESRD |
| SOFA Liver (Bilirubin, μmol/L [mg/dl])                 | <20.5 (<1.2)       | 20.5-34.1 (1.2-1.9)    | ≥34.2 (≥2)                                         |
| SOFA Coagulation (Platelets, ×10 <sup>9</sup> cells/L) | ≥150               | 100-149                | ≤99                                                |

<sup>a</sup>Missing data were categorized as 0.

<sup>b</sup>Renal, liver, and coagulation SOFA scores of 2, 3, or 4 were binned due to low frequency of events in categories “3” and “4”.

<sup>c</sup>If the UOP was missing, the category was assigned according to the Cr

Abbreviations: Cr, creatinine (mg/dl); ESRD, end stage renal disease; RRT, renal replacement therapy; UOP, urine output.

Severity-of-illness covariates assessed on ICU days 1 and 2

Inflammation on ICU days 1 or 2. Three mutually exclusive categories were created: inflamed, non-inflamed, or missing. Inflamed was defined as at least one of the following on either ICU day 1 or 2: C-reactive protein >100 mg/L, D-dimer >1,000 mg/L, or Ferritin >1,000 μg/L. Non-inflamed was defined as at least one value that was below the threshold on either ICU day 1 or 2 and no value that was above the threshold for the above parameters. Missing was defined as all three values being missing on both ICU days 1 and 2

Concurrent therapies (each assessed individually) received on either ICU days 1 or 2

Aspirin; prone positioning; neuromuscular blockade.

Missing data

The renal, liver, and coagulation components of the SOFA score were categorized as “0” if missing.<sup>4-6</sup> Otherwise, missing data were not imputed. Rather, we created a separate missing category for each covariate that had missing data, since data may not have been missing at random.

## SUPPLEMENTAL TABLES

**Table 1. List of Participating Sites**

|                                                                 |
|-----------------------------------------------------------------|
| <b>Northeast</b>                                                |
| Beth Israel Deaconess Medical Center                            |
| Brigham and Women's Faulkner Hospital                           |
| Brigham and Women's Hospital                                    |
| Cooper University Health Care                                   |
| Hackensack Meridian Health Hackensack University Medical Center |
| Hackensack Mountainside Hospital                                |
| Johns Hopkins Hospital                                          |
| Kings County Hospital Center                                    |
| Lowell General Hospital                                         |
| Massachusetts General Hospital                                  |
| MedStar Georgetown University Hospital                          |
| Montefiore Medical Center                                       |
| Mount Sinai                                                     |
| Newton Wellesley Hospital                                       |
| New York-Presbyterian Queens Hospital                           |
| New York-Presbyterian/Weill Cornell Medical Center              |
| New York University Langone Hospital                            |
| Rutgers/New Jersey Medical School                               |
| Rutgers/Robert Wood Johnson Medical School                      |
| Temple University Hospital                                      |
| Thomas Jefferson University Hospital                            |
| Tufts Medical Center                                            |
| United Health Services Hospitals                                |
| University of Pennsylvania Health System                        |
| University of Pittsburgh Medical Center                         |
| Westchester Medical Center                                      |
| Yale University Medical Center                                  |
| <b>South</b>                                                    |
| Baylor College of Medicine, Houston                             |
| Baylor University Medical Center/Baylor Scott White and Health  |
| Duke University Medical Center                                  |
| Mayo Clinic, Florida                                            |
| Memphis VA Medical Center                                       |
| Methodist University Hospital                                   |
| Ochsner Medical Center                                          |
| Tulane Medical Center                                           |
| University of Alabama-Birmingham Hospital                       |
| University of Florida Health-Gainesville                        |
| University of Florida Health-Jacksonville                       |
| University of Miami Health System                               |
| University of North Carolina Hospitals                          |
| University of Texas Southwestern Medical Center                 |
| University of Virginia Health System                            |
| <b>Midwest</b>                                                  |
| Barnes-Jewish Hospital                                          |
| Cook County Health                                              |
| Froedtert Hospital                                              |
| Indiana University Health Methodist Hospital                    |
| Northwestern Memorial Hospital                                  |
| Promedica Health System                                         |
| Rush University Medical Center                                  |
| University Hospitals Cleveland Medical Center                   |
| University of Chicago Medical Center                            |
| University of Illinois Hospital and Health Sciences System      |
| University of Kentucky Hospital                                 |
| University of Michigan Hospital                                 |
| University of Oklahoma Health Sciences Center                   |
| <b>West</b>                                                     |
| Loma Linda University Medical Center                            |
| Mayo Clinic, Arizona                                            |
| Oregon Health and Science University Hospital                   |
| Renown Health                                                   |
| Stanford Healthcare                                             |
| University of California-Davis Medical Center                   |
| University of California-Los Angeles Medical Center             |
| University of California-San Diego Medical Center               |
| University of California-San Francisco Medical Center           |
| UCHealth University of Colorado                                 |
| University Medical Center of Southern Nevada                    |
| University of Washington Medical Center                         |

**Table 2. Definitions of Baseline Characteristics, Comorbidities, Treatments, and Outcomes**

|                                                   |                                                                                                                                                                                                                                                                                                                                                                                                                                                                                                                          |
|---------------------------------------------------|--------------------------------------------------------------------------------------------------------------------------------------------------------------------------------------------------------------------------------------------------------------------------------------------------------------------------------------------------------------------------------------------------------------------------------------------------------------------------------------------------------------------------|
| <b>Baseline Characteristics</b>                   |                                                                                                                                                                                                                                                                                                                                                                                                                                                                                                                          |
| Home medications                                  | Medications that the patient was taking at home within 1 week prior to admission. Does not include those started at an outside hospital if the patient was transferred.                                                                                                                                                                                                                                                                                                                                                  |
| Anticoagulation                                   | Oral anticoagulation or therapeutic parenteral anticoagulation, not including anti-platelet agents such as aspirin or clopidogrel                                                                                                                                                                                                                                                                                                                                                                                        |
| <b>Coexisting Conditions</b>                      |                                                                                                                                                                                                                                                                                                                                                                                                                                                                                                                          |
| Asthma                                            | Per chart review                                                                                                                                                                                                                                                                                                                                                                                                                                                                                                         |
| Atrial fibrillation/flutter                       | Per chart review                                                                                                                                                                                                                                                                                                                                                                                                                                                                                                         |
| Active malignancy                                 | Per chart review; active malignancy (other than non-melanoma skin cancer) treated in the past year. Defined as cancer of the lung, breast, colorectal, prostate, gastric, pancreatic, melanoma, ovarian, brain, or other                                                                                                                                                                                                                                                                                                 |
| Chronic kidney disease                            | Baseline eGFR < 60 on at least two consecutive values at least 12 weeks apart prior to hospital admission. If not available, defined as per chart review                                                                                                                                                                                                                                                                                                                                                                 |
| Chronic liver disease                             | Cirrhosis, alcohol-related liver disease, nonalcoholic fatty liver disease, autoimmune hepatitis, hepatitis B or hepatitis C, primary biliary cirrhosis, or other                                                                                                                                                                                                                                                                                                                                                        |
| Chronic obstructive pulmonary disease             | Per chart review                                                                                                                                                                                                                                                                                                                                                                                                                                                                                                         |
| Congestive heart failure                          | Per chart review; heart failure with preserved versus reduced ejection fraction                                                                                                                                                                                                                                                                                                                                                                                                                                          |
| Coronary artery disease                           | Per chart review; any history of angina, myocardial infarction, or coronary artery bypass graft surgery                                                                                                                                                                                                                                                                                                                                                                                                                  |
| Diabetes mellitus                                 | Per chart review; insulin versus non-insulin dependent                                                                                                                                                                                                                                                                                                                                                                                                                                                                   |
| End stage renal disease                           | Per chart review; on hemodialysis or peritoneal dialysis                                                                                                                                                                                                                                                                                                                                                                                                                                                                 |
| History of alcohol abuse                          | Per chart review                                                                                                                                                                                                                                                                                                                                                                                                                                                                                                         |
| HIV/AIDS                                          | Per chart review                                                                                                                                                                                                                                                                                                                                                                                                                                                                                                         |
| Homelessness                                      | Per chart review                                                                                                                                                                                                                                                                                                                                                                                                                                                                                                         |
| Hypertension                                      | Per chart review                                                                                                                                                                                                                                                                                                                                                                                                                                                                                                         |
| Smoking                                           | Per chart review; does not include vaping or smoking of non-tobacco products. Non-smoker, former smoker, current smoker                                                                                                                                                                                                                                                                                                                                                                                                  |
| <b>Longitudinal Treatments<sup>a</sup></b>        |                                                                                                                                                                                                                                                                                                                                                                                                                                                                                                                          |
| Extracorporeal membrane oxygenation               | Veno-venous, veno-arterial, or veno-arterial-venous                                                                                                                                                                                                                                                                                                                                                                                                                                                                      |
| Mechanical ventilation                            | Invasive mechanical ventilation                                                                                                                                                                                                                                                                                                                                                                                                                                                                                          |
| Renal replacement therapy                         | CRRT, intermittent hemodialysis, peritoneal dialysis, other                                                                                                                                                                                                                                                                                                                                                                                                                                                              |
| PaO <sub>2</sub> <sup>b</sup>                     | Lowest PaO <sub>2</sub> available during each 24 hour day (midnight to midnight)                                                                                                                                                                                                                                                                                                                                                                                                                                         |
| FiO <sub>2</sub> <sup>b</sup>                     | FiO <sub>2</sub> corresponding to the lowest PaO <sub>2</sub>                                                                                                                                                                                                                                                                                                                                                                                                                                                            |
| PEEP <sup>b</sup>                                 | Highest PEEP available during each 24-hour day (midnight to midnight)                                                                                                                                                                                                                                                                                                                                                                                                                                                    |
| Vasopressors                                      | Maximum number of vasopressors required each day                                                                                                                                                                                                                                                                                                                                                                                                                                                                         |
| <b>Outcomes<sup>a</sup></b>                       |                                                                                                                                                                                                                                                                                                                                                                                                                                                                                                                          |
| Acute kidney injury <sup>c</sup>                  | Doubling of serum creatinine from baseline or need for renal replacement therapy (RRT), corresponding with stages 2 and 3 of the Kidney Disease: Improving Global Outcomes Criteria. <sup>1</sup> Baseline serum creatinine was defined as the lowest value from within 365 to 7 days prior to hospital admission. If unavailable, the hospital admission value was used as the baseline.                                                                                                                                |
| Acute liver injury                                | Modified version of the CTCAE criteria <sup>2</sup> : bilirubin >51.3 μmol/L (3.0 mg/dl) and either AST >100 units per liter or ALT >100 units per liter                                                                                                                                                                                                                                                                                                                                                                 |
| Coagulopathy                                      | INR >2 or aPTT >58 seconds (which is approximately twice the central value of most aPTT reference ranges) in the absence of oral anticoagulation or therapeutic parenteral anticoagulation                                                                                                                                                                                                                                                                                                                               |
| Congestive heart failure (new onset)              | Per chart review; includes both heart failure with preserved and reduced ejection fraction                                                                                                                                                                                                                                                                                                                                                                                                                               |
| Disseminated intravascular coagulation            | Per chart review (diagnosis assigned by treating physician)                                                                                                                                                                                                                                                                                                                                                                                                                                                              |
| Heparin-induced thrombocytopenia                  | Per chart review                                                                                                                                                                                                                                                                                                                                                                                                                                                                                                         |
| Major bleed                                       | Per chart review; bleeding in a critical area or organ (e.g., intracranial, retroperitoneal, pericardial, or intramuscular bleeding with compartment syndrome) or bleeding requiring a procedural intervention (e.g., EGD or IR embolization). Requirement for red cell transfusion alone did <i>not</i> result in the bleeding event qualifying as a major bleed. Bleeds for which a procedural intervention was clearly indicated but which could not be done (due to COVID status or critical illness) were included. |
| Respiratory failure                               | Requirement for invasive mechanical ventilation                                                                                                                                                                                                                                                                                                                                                                                                                                                                          |
| Shock                                             | Requirement for 2 or more vasopressors                                                                                                                                                                                                                                                                                                                                                                                                                                                                                   |
| Radiographically-confirmed venous thromboembolism | Per chart review; deep vein thrombosis confirmed on ultrasound or cross-sectional imaging or pulmonary embolism confirmed on contrast-enhanced CT scan or ventilation/perfusion scan. Does not include superficial venous thrombosis.                                                                                                                                                                                                                                                                                    |

|                 |                                                                                                      |
|-----------------|------------------------------------------------------------------------------------------------------|
| Ischemic stroke | Per chart review; does not include hemorrhagic stroke, which is classified as a major bleeding event |
|-----------------|------------------------------------------------------------------------------------------------------|

Abbreviations: ALT, alanine transaminase; aPTT, activated partial thromboplastin time; AST, aspartate transaminase; COVID-19, coronavirus disease-2019; CRRT, continuous renal replacement therapy, CT, computed tomography; CTCAE, Common Terminology Criteria for Adverse Events; DVT, deep vein thrombosis; EGD, esophagogastroduodenoscopy; eGFR, estimated glomerular filtration rate; FiO<sub>2</sub>, fraction of inspired oxygen; HIV/AIDS, human immunodeficiency virus/acquired immunodeficiency syndrome; IR, interventional radiology; LVAD, left ventricular assist device; PaO<sub>2</sub>, partial pressure of oxygen; PE, pulmonary embolism; PEEP, positive end-expiratory pressure.

<sup>a</sup>Longitudinal treatments and outcomes were recorded daily for the first 14 days following admission to the ICU. If multiple values were present, the lowest PaO<sub>2</sub> available, along with the corresponding FiO<sub>2</sub> at the time, was recorded, while the highest PEEP on each day was recorded. If the patient had an outcome, the date of the outcome was recorded.

<sup>b</sup>Only applies to patients on mechanical ventilation with an arterial blood gas available.

<sup>c</sup>Excludes patients with end stage renal disease.

#### References in Table 2

<sup>1</sup>Kidney Disease; Improving Global Outcomes (KDIGO) Acute Kidney Injury Work Group. KDIGO clinical practice guideline for acute kidney injury. *Kidney Int Suppl* 2, 2012: 1-138.

<sup>2</sup>US Department of Health and Human Services. Common Terminology Criteria for Adverse Events (CTCAE). Bethesda, MD: National Institute of Health, National Cancer Institute, 2017.

**Table 3. Complete List of Patient Characteristics at Baseline.**

| Characteristic                                                        | All Patients (N=3239)           | Confirmed VTE (N=204)           | No Confirmed VTE (N=3035)       | Major Bleeding (N=90)           | No Major Bleeding (N=3149)      |
|-----------------------------------------------------------------------|---------------------------------|---------------------------------|---------------------------------|---------------------------------|---------------------------------|
| <b>Demographics</b>                                                   |                                 |                                 |                                 |                                 |                                 |
| Age (yr)                                                              |                                 |                                 |                                 |                                 |                                 |
| Median (IQR)                                                          | 61.0 (52.5-71.0)                | 60.0 (50.0-67.3)                | 62.0 (52-71)                    | 62.5 (55.3-73.8)                | 62.0 (51.0-71.0)                |
| Distribution – no. (%)                                                |                                 |                                 |                                 |                                 |                                 |
| 18–39                                                                 | 278 (8.6)                       | 16 (7.8)                        | 262 (8.6)                       | 5 (5.6)                         | 273 (8.7)                       |
| 40–49                                                                 | 407 (12.6)                      | 32 (15.7)                       | 375 (12.4)                      | 6 (6.7)                         | 401 (12.7)                      |
| 50–59                                                                 | 691 (21.3)                      | 51 (25.0)                       | 640 (21.1)                      | 23 (25.6)                       | 668 (21.2)                      |
| 60–69                                                                 | 916 (28.3)                      | 66 (32.4)                       | 850 (28.0)                      | 23 (25.6)                       | 893 (28.4)                      |
| 70–79                                                                 | 648 (20.0)                      | 30 (14.7)                       | 618 (20.4)                      | 23 (25.6)                       | 625 (19.9)                      |
| ≥80                                                                   | 299 (9.2)                       | 9 (4.4)                         | 290 (9.6)                       | 10 (11.1)                       | 289 (9.2)                       |
| Male sex – no. (%)                                                    | 2088 (64.5)                     | 149 (73.0)                      | 1939 (63.9)                     | 64 (71.1)                       | 2024 (64.3)                     |
| Race – no. (%)                                                        |                                 |                                 |                                 |                                 |                                 |
| White                                                                 | 1194 (36.9)                     | 66 (32.4)                       | 1128 (37.2)                     | 33 (36.7)                       | 1161 (26.9)                     |
| Black                                                                 | 1015 (31.3)                     | 86 (42.2)                       | 929 (30.6)                      | 28 (31.1)                       | 987 (31.3)                      |
| Asian                                                                 | 198 (6.1)                       | 5 (2.5)                         | 193 (6.4)                       | 8 (8.9)                         | 190 (6.0)                       |
| Other                                                                 | 832 (25.7)                      | 47 (23.0)                       | 785 (25.9)                      | 21 (23.3)                       | 811 (25.8)                      |
| Hispanic – no. (%)                                                    | 663 (20.5)                      | 37 (18.1)                       | 626 (20.6)                      | 14 (15.6)                       | 649 (20.6)                      |
| Body mass index – median (IQR)                                        | 30.3 (25.5-36.0)                | 30.9 (26.9-36.7)                | 30.3 (26.5-35.9)                | 28.4 (25.2-32.2)                | 30.4 (26.6-36.2)                |
| Pregnant – no. (%)                                                    | 20 (0.6)                        | 1 (0.5)                         | 19 (0.6)                        | 1 (1.1)                         | 19 (0.6)                        |
| Homeless – no. (%)                                                    | 23 (0.7)                        | 1 (0.5)                         | 22 (0.7)                        | 1 (1.1)                         | 22 (0.7)                        |
| Source of admission to ICU – no. (%)                                  |                                 |                                 |                                 |                                 |                                 |
| Emergency department                                                  | 1801 (55.6)                     | 106 (52.0)                      | 1695 (55.9)                     | 45 (50.0)                       | 1756 (55.8)                     |
| Hospital ward                                                         | 1006 (31.1)                     | 59 (28.9)                       | 947 (31.2)                      | 34 (37.8)                       | 972 (30.9)                      |
| Transfer from another hospital                                        | 417 (12.9)                      | 38 (18.6)                       | 379 (12.5)                      | 11 (12.2)                       | 406 (12.9)                      |
| Other                                                                 | 15 (0.5)                        | 1 (0.5)                         | 14 (0.5)                        | 0 (0.0)                         | 15 (0.5)                        |
| <b>Coexisting conditions – no. (%)<sup>a</sup></b>                    |                                 |                                 |                                 |                                 |                                 |
| Diabetes mellitus, insulin dependent                                  | 464 (14.3)                      | 19 (9.3)                        | 445 (14.7)                      | 19 (21.1)                       | 445 (14.1)                      |
| Diabetes mellitus, non-insulin dependent                              | 847 (26.2)                      | 53 (26.0)                       | 794 (26.2)                      | 30 (33.3)                       | 817 (26.0)                      |
| Hypertension                                                          | 1977 (61.0)                     | 109 (53.4)                      | 1868 (61.6)                     | 60 (66.7)                       | 1917 (60.9)                     |
| Chronic lung disease                                                  |                                 |                                 |                                 |                                 |                                 |
| Chronic obstructive pulmonary disease                                 | 273 (8.4)                       | 15 (7.4)                        | 258 (8.5)                       | 8 (8.9)                         | 265 (8.4)                       |
| Asthma                                                                | 344 (10.6)                      | 22 (10.8)                       | 322 (10.6)                      | 6 (6.7)                         | 338 (10.7)                      |
| Other pulmonary disease                                               | 238 (7.4)                       | 16 (7.8)                        | 222 (7.3)                       | 8 (8.9)                         | 230 (7.3)                       |
| Current or former smoker                                              | 957 (29.6)                      | 62 (30.4)                       | 895 (29.5)                      | 24 (26.7)                       | 933 (29.6)                      |
| Alcohol abuse disorder                                                | 177 (5.5)                       | 7 (3.4)                         | 170 (5.6)                       | 7 (7.8)                         | 170 (5.4)                       |
| Coronary artery disease                                               | 431 (13.3)                      | 23 (11.3)                       | 408 (13.4)                      | 19 (21.1)                       | 412 (13.1)                      |
| Congestive heart failure                                              | 305 (9.4)                       | 13 (6.4)                        | 292 (9.6)                       | 12 (13.3)                       | 293 (9.3)                       |
| Chronic liver disease                                                 | 107 (3.3)                       | 3 (1.5)                         | 104 (3.4)                       | 4 (4.4)                         | 103 (3.3)                       |
| Chronic kidney disease                                                | 407 (12.6)                      | 21 (10.3)                       | 386 (12.7)                      | 15 (16.7)                       | 392 (12.5)                      |
| End stage kidney disease                                              | 98 (3.0)                        | 4 (2.0)                         | 94 (3.1)                        | 9 (10.0)                        | 89 (2.8)                        |
| Active malignancy                                                     | 162 (5.0)                       | 9 (4.4)                         | 153 (5.0)                       | 6 (6.7)                         | 156 (5.0)                       |
| Immunodeficiency                                                      | 78 (2.4)                        | 5 (2.5)                         | 73 (2.4)                        | 5 (5.6)                         | 73 (2.3)                        |
| HIV/AIDS                                                              | 48 (1.5)                        | 5 (2.5)                         | 43 (1.4)                        | 0 (0.0)                         | 48 (1.5)                        |
| <b>Home medications – no. (%)</b>                                     |                                 |                                 |                                 |                                 |                                 |
| Immunosuppressive medication                                          | 339 (10.5)                      | 14 (6.9)                        | 325 (11.1)                      | 15 (16.7)                       | 324 (10.3)                      |
| ACE-I                                                                 | 591 (18.3)                      | 31 (15.2)                       | 560 (18.5)                      | 21 (23.3)                       | 570 (18.1)                      |
| ARB                                                                   | 527 (16.3)                      | 22 (10.8)                       | 505 (16.6)                      | 13 (14.4)                       | 514 (16.3)                      |
| Mineralocorticoid receptor antagonist                                 | 84 (2.6)                        | 2 (1.0)                         | 82 (2.7)                        | 7 (7.8)                         | 77 (2.5)                        |
| Beta-blocker                                                          | 868 (26.8)                      | 43 (21.1)                       | 824 (27.2)                      | 33 (36.7)                       | 834 (26.5)                      |
| Other antihypertensive                                                | 949 (29.3)                      | 52 (25.5)                       | 896 (29.5)                      | 25 (27.8)                       | 923 (29.3)                      |
| Statin                                                                | 1415 (43.7)                     | 113 (55.4)                      | 1301 (42.9)                     | 35 (38.9)                       | 1379 (43.8)                     |
| NSAID                                                                 | 267 (8.2)                       | 22 (10.8)                       | 245 (8.1)                       | 3 (3.3)                         | 264 (8.4)                       |
| Aspirin                                                               | 715 (22.1)                      | 41 (21.1)                       | 674 (22.2)                      | 34 (37.8)                       | 681 (21.6)                      |
| Anticoagulation                                                       | 305 (9.4)                       | 7 (3.4)                         | 298 (9.8)                       | 16 (17.8)                       | 289 (9.2)                       |
| Vitamin C                                                             | 84 (2.6)                        | 7 (3.4)                         | 77 (2.5)                        | 7 (7.8)                         | 77 (2.5)                        |
| Vitamin D                                                             | 341 (10.5)                      | 17 (8.3)                        | 324 (10.7)                      | 17 (18.9)                       | 324 (10.3)                      |
| <b>Vital signs on the day of ICU admission – median (IQR)</b>         |                                 |                                 |                                 |                                 |                                 |
| Temperature – °C                                                      | 38.0 (37.3-38.9)                | 38.1 (37.3-39.0)                | 38.0 (37.3-38.9)                | 37.7 (38.8-37.1)                | 38.0 (37.3-38.9)                |
| Systolic blood pressure – mm Hg                                       | 96 (86-111)                     | 96 (85-108)                     | 97 (86-111)                     | 90 (81.5-107.5)                 | 97 (86-111)                     |
| Heart rate – beats per min                                            | 104 (90-120)                    | 106 (92-120)                    | 104 (90-120)                    | 107 (92-120)                    | 104 (90-120)                    |
| Respiratory rate – per min                                            | 31 (26-38)                      | 32 (27-39)                      | 31 (26-38)                      | 30 (25-36)                      | 31 (26-38)                      |
| <b>Laboratory findings on the day of ICU admission – median (IQR)</b> |                                 |                                 |                                 |                                 |                                 |
| Leukocyte count – per mm <sup>3</sup>                                 | 8.2 (5.9-11.5)                  | 8.6 (6.5-11.6)                  | 8.16 (5.9-11.5)                 | 8.55 (5.9-13.2)                 | 8.2 (5.9-11.5)                  |
| Hemoglobin – g/dl                                                     | 12.7 (11.1-14.1)                | 12.8 (11.3-14.3)                | 12.7 (11.1-14.1)                | 12.0 (8.7-13.3)                 | 12.7 (11.2-14.1)                |
| Platelet count – ×10 <sup>9</sup> cells/L                             | 213 (163-271)                   | 218 (171-277)                   | 212 (162-270)                   | 177 (133-277)                   | 213 (164-270)                   |
| Creatinine – mg/dl                                                    | 1.07 (0.80-1.62)                | 1.10 (0.86-1.65)                | 1.06 (0.80-1.62)                | 1.48 (0.83-2.69)                | 1.06 (0.80-1.60)                |
| Albumin – g/dl                                                        | 3.2 (2.8-3.6)                   | 3.1 (2.8-3.6)                   | 3.2 (2.8-3.6)                   | 3.1 (2.7-3.4)                   | 3.2 (2.8-3.6)                   |
| Aspartate aminotransferase – U/L                                      | 54 (36-85)                      | 55 (38-90)                      | 54 (36-85)                      | 56 (36-97)                      | 54 (36-85)                      |
| Alanine aminotransferase – U/L                                        | 36 (23-60)                      | 39 (24-67)                      | 36 (23-59)                      | 37 (23-63)                      | 36 (23-60)                      |
| Total bilirubin – μmol/L [mg/dl]                                      | 10.3 (6.8-13.7) [0.6 (0.4-0.8)] | 12.0 (8.6-15.4) [0.7 (0.5-0.9)] | 10.3 (6.8-13.7) [0.6 (0.4-0.8)] | 10.3 (6.8-17.1) [0.6 (0.4-1.0)] | 10.3 (6.8-13.7) [0.6 (0.4-0.8)] |

|                                                                        |                    |                     |                    |                    |                    |
|------------------------------------------------------------------------|--------------------|---------------------|--------------------|--------------------|--------------------|
| Lactate – mmol/L                                                       | 1.5 (1.1-2.3)      | 1.6 (1.2-2.3)       | 1.5 (1.1-2.2)      | 1.7 (1.4-2.6)      | 1.5 (1.1-2.2)      |
| Arterial pH                                                            | 7.37 (7.30-7.43)   | 7.36 (7.30-7.42)    | 7.37 (7.30-7.43)   | 7.35 (7.30-7.40)   | 7.37 (7.30-7.43)   |
| D-dimer – mg/L FEU                                                     | 1.32 (0.70-3.26)   | 2.32 (1.01-9.22)    | 1.29 (0.69-3.05)   | 3.70 (1.35-15.41)  | 1.30 (0.70-3.18)   |
| C-reactive protein – mg/L                                              | 157.2 (90.0-237.7) | 171.0 (102.9-250.3) | 156.9 (88.7-237.0) | 128.6 (68.6-229.3) | 158.0 (91.0-238.0) |
| Interleukin-6 – pg/mL                                                  | 58.1 (20.0-158.6)  | 33.0 (8.0-87.5)     | 61.4 (21.1-160.2)  | 31.5 (12.2-54.3)   | 61.2 (20.0-162.4)  |
| Procalcitonin – ng/ml                                                  | 0.41 (0.15-1.38)   | 0.40 (0.18-1.40)    | 0.41 (0.15-1.37)   | 0.80 (0.30-3.96)   | 0.40 (0.15-1.34)   |
| Ferritin – µg/L                                                        | 1032 (505-2000)    | 1258 (651-2335)     | 1013.5 (499-2000)  | 1457.4 (714-3008)  | 1019 (501-2000)    |
| Creatine phosphokinase – U/L                                           | 207 (97-546)       | 267 (95-601)        | 202 (97-546)       | 172 (87-357)       | 211 (97-548)       |
| Fibrinogen – g/dL                                                      | 6.14 (4.97-7.53)   | 6.31 (4.16-6.92)    | 6.12 (4.97-7.53)   | 3.96 (2.85-4.87)   | 6.17 (5.09-7.55)   |
| High-sensitivity cardiac troponin – ng/L                               | 16 (7-50)          | 9 (22-98)           | 16 (7-49)          | 100 (46-173)       | 16 (7-48)          |
| <b>Severity-of-illness on the day of ICU admission</b>                 |                    |                     |                    |                    |                    |
| Invasive mechanical ventilation – no. (%)                              | 2132 (65.8)        | 144 (70.6)          | 1987 (65.5)        | 68 (75.6)          | 2062 (63.7)        |
| FiO <sub>2</sub> – median (IQR)                                        | 80 (60-100)        | 82.5 (50-100)       | 80 (60-100)        | 80 (50-100)        | 80 (60-100)        |
| PEEP, cm of water – median (IQR)                                       | 12 (10-15)         | 14 (10-16)          | 12 (10-15)         | 10 (9.5-15)        | 12 (10-15)         |
| PaO <sub>2</sub> :FiO <sub>2</sub> , mm Hg – median (IQR) <sup>b</sup> | 127 (86-195)       | 125 (89-201)        | 127 (86-195)       | 150 (92-254)       | 126 (85-194)       |
| Non-invasive mechanical ventilation – no. (%)                          | 706 (21.80)        | 40 (19.61)          | 666 (21.94)        | 7 (7.78)           | 699 (22.20)        |
| High-flow nasal cannula or non-rebreather mask – no. (%)               | 648 (20.01)        | 39 (19.18)          | 609 (20.07)        | 7 (7.78)           | 641 (20.36)        |
| Vasopressors – no. (%)                                                 | 1364 (42.11)       | 98 (48.04)          | 1266 (41.71)       | 40 (44.44)         | 1008 (32.01)       |
| Altered mental status – no. (%)                                        | 728 (22.48)        | 55 (26.96)          | 673 (22.17)        | 37 (41.11)         | 691 (21.94)        |
| Acute kidney injury – no. (%)                                          | 1164 (37.7)        | 64 (32.7)           | 1100 (38.0)        | 30 (35.7)          | 1134 (37.7)        |
| Acute liver injury – no. (%)                                           | 17 (0.6%)          | 0 (0.0%)            | 17 (0.7%)          | 3 (3.9%)           | 14 (0.6%)          |
| Renal replacement therapy – no. (%)                                    | 118 (3.6)          | 8 (3.9)             | 110 (3.6)          | 6 (6.7)            | 112 (3.6)          |

Abbreviations: ACE-I, Angiotensin converting enzyme inhibitor; ARB, Angiotensin II receptor blocker; HIV/AIDS, Human immunodeficiency virus infection/acquired immune deficiency syndrome; NSAID, nonsteroidal anti-inflammatory drug; PEEP, positive end-expiratory pressure.

<sup>a</sup>The definitions of the coexisting disorders are provided in the supplemental material.

<sup>b</sup>PaO<sub>2</sub>:FiO<sub>2</sub> refers to the ratio of the partial pressure of arterial oxygen (PaO<sub>2</sub>) over the fraction of inspired oxygen (FiO<sub>2</sub>), and was only assessed in patients receiving invasive mechanical ventilation.

Data regarding body mass index were missing for 228 patients (7.0%).

Data regarding systolic blood pressure were missing for 4 patients (0.1%).

Data regarding heart rate were missing for 3 patients (0.1%).

Data regarding leukocyte count were missing for 180 patients (5.6%).

Data regarding hemoglobin were missing for 186 patients (5.7%).

Data regarding platelet count were missing for 195 patients (6.0%).

Data regarding creatinine were missing for 149 patients (4.6%).

Data regarding albumin were missing for 617 patients (19.0%).

Data regarding aspartate aminotransferase were missing for 606 patients (18.7%).

Data regarding alanine aminotransferase were missing for 586 patients (18.1%).

Data regarding total bilirubin were missing for 593 patients (18.3%).

Data regarding lactate were missing for 1232 patients (38.0%).

Data regarding arterial pH were missing for 1005 patients (31.0%).

Data regarding D-dimer were missing for 1615 patients (49.9%).

Data regarding C-reactive protein were missing for 1291 patients (39.9%).

Data regarding interleukin-6 were missing for 2595 patients (80.1%).

Data regarding procalcitonin were missing in 1193 patients (36.7%).

Data regarding ferritin were missing in 1423 patients (43.9%).

Data regarding creatine phosphokinase were missing in 1682 patients (51.9%).

Data regarding fibrinogen were missing in 2648 patients (81.8%).

Data regarding high-sensitivity cardiac troponin were missing in 2588 patients (79.9%).

Data regarding FiO<sub>2</sub> were missing for 218 out of 2132 mechanically ventilated patients (10.2%).

Data regarding PEEP were missing for 236 out of 2132 mechanically ventilated patients (11.1%).

Data regarding PaO<sub>2</sub>:FiO<sub>2</sub> were missing for 354 patients out of 2132 mechanically ventilated patients (16.6%).

Data necessary to determine presence of acute kidney injury on ICU day 1 were missing in 151 patients (4.7%).

Data necessary to determine presence of acute liver injury on ICU day 1 were missing in 593 patients (18.3%).

All other variables had no missing data.

**Table 4. Anticoagulants Used in Patients Treated with Therapeutic Anticoagulation.** Some patients were transitioned from one agent to another during the course of treatment, and thus the sum of the percentages shown in the table is greater than 100.

| <b>Anticoagulant</b>                                    | <b>No. Patients / Total No. Patients Treated with Therapeutic Anticoagulation (%)</b> |
|---------------------------------------------------------|---------------------------------------------------------------------------------------|
| Unfractionated heparin infusion                         | 884/1412 (62.6)                                                                       |
| Low molecular weight heparin (enoxaparin or dalteparin) | 486/1412 (34.4)                                                                       |
| Bivalirudin                                             | 41/1412 (2.9)                                                                         |
| Argatroban                                              | 32/1412 (2.3)                                                                         |
| Other (fondaparinux or oral anticoagulant)              | 203/1412 (14.4)                                                                       |

**Table 5. Indications for Initiation of Therapeutic Anticoagulation in First Two Days of ICU Admission for Patients Included in Target Trial Emulation (n=384).** The sum of the numbers below is more than 384 because some patients had more than one reason for receiving therapeutic anticoagulation.

| <b>Indication</b>                              | <b>Number of Patients (%)</b> |
|------------------------------------------------|-------------------------------|
| Atrial fibrillation or atrial flutter          | 55 (14.3%)                    |
| Acute coronary syndrome/myocardial infarction  | 33 (8.6%)                     |
| Hypercoagulable state associated with COVID-19 | 199 (51.8%)                   |
| Other                                          | 159 (41.4%)                   |



## SUPPLEMENTAL FIGURES

**Figure 1. Number of Cohort Patients by City Among Contributing Sites.** Red bubbles demonstrate the number of patients contributed by each site.

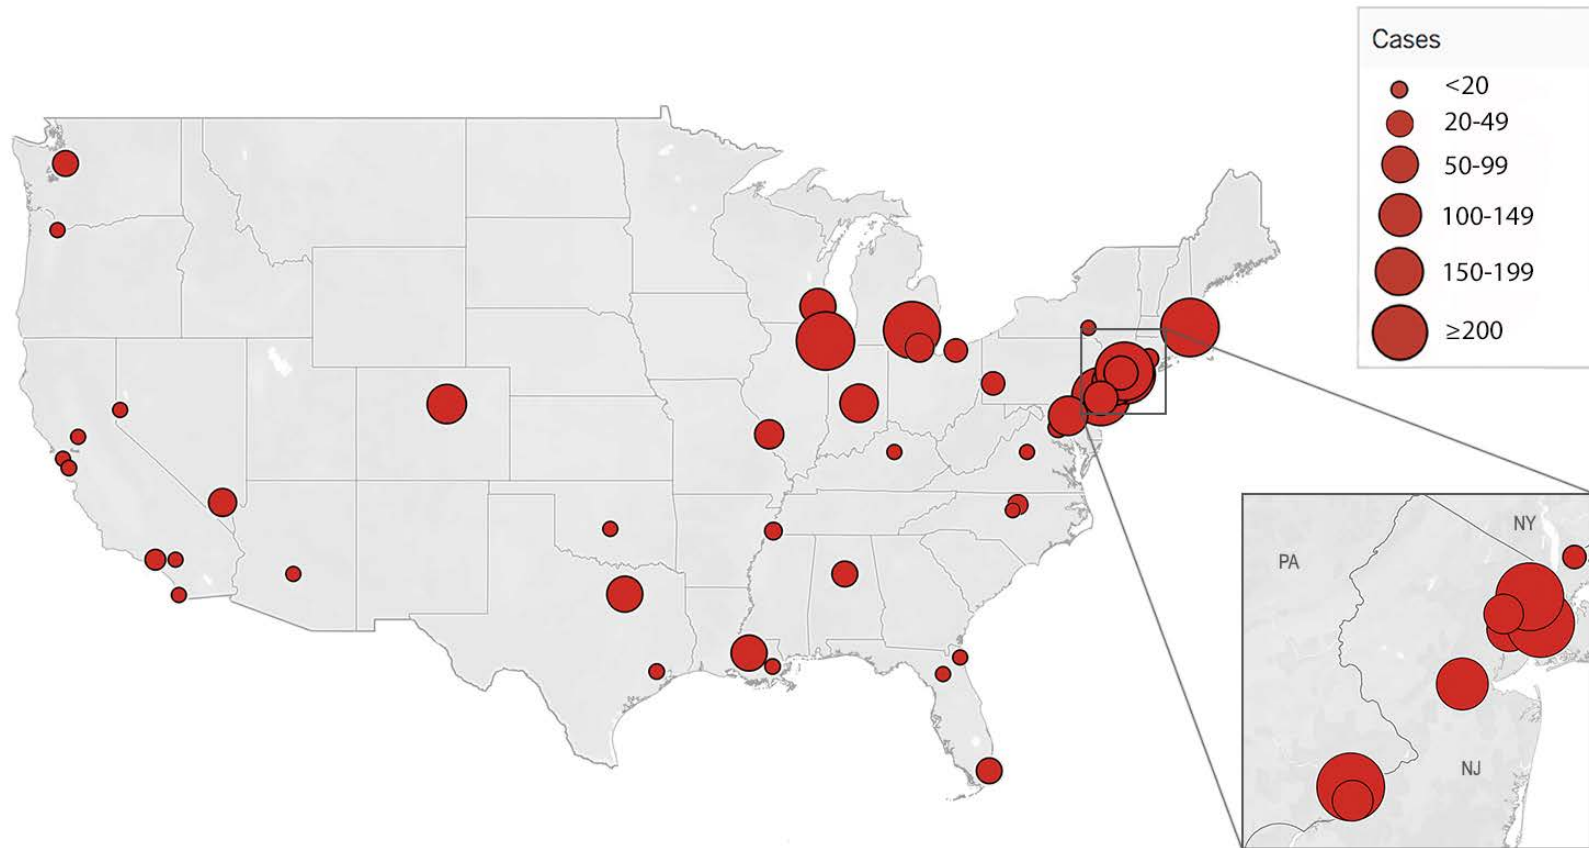

**Figure 2.** Cumulative incidence of radiographically-confirmed venous thromboembolism (A), major bleeding (B), and initiation of therapeutic anticoagulation (C). Note the different scale of the y-axis in panel C. (D) Multivariable model of predictors for VTE. Abbreviations: VTE, venous thromboembolism.

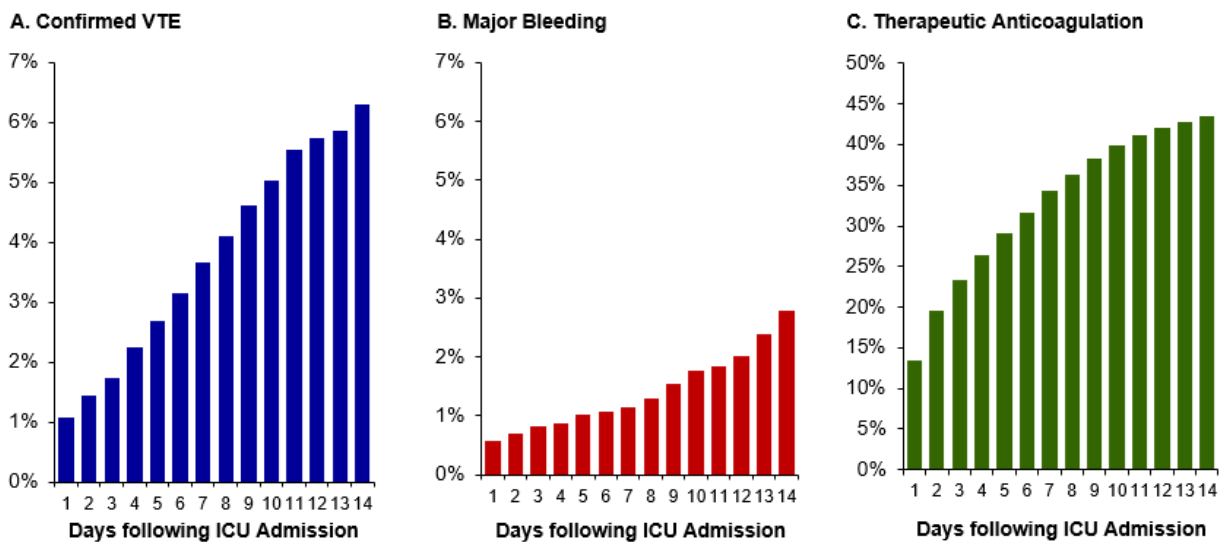

**D**

| Variable                                         | No. Events | No. Patients | Unadjusted OR (95% CI) | Adjusted OR (95% CI) | Forest Plot (Adjusted OR) |
|--------------------------------------------------|------------|--------------|------------------------|----------------------|---------------------------|
| <b>Age (yrs)</b>                                 |            |              |                        |                      |                           |
| 18-39                                            | 16         | 278          | 1.00                   | 1.00                 |                           |
| 40-59                                            | 83         | 1098         | 1.32 (0.75-2.34)       | 1.33 (0.73-2.40)     |                           |
| 60-79                                            | 96         | 1564         | 0.99 (0.56-1.74)       | 1.03 (0.56-1.88)     |                           |
| >80                                              | 9          | 299          | 0.45 (0.19-1.06)       | 0.45 (0.18-1.11)     |                           |
| <b>Male sex</b>                                  | 149        | 2088         | 1.62 (1.16-2.24)       | 1.60 (1.13-2.27)     |                           |
| <b>BMI (kg/m<sup>2</sup>)</b>                    |            |              |                        |                      |                           |
| <30                                              | 87         | 1445         | 1.00                   | 1.00                 |                           |
| 30-39.9                                          | 74         | 1111         | 1.17 (0.84-1.63)       | 1.20 (0.82-1.74)     |                           |
| ≥40                                              | 37         | 455          | 1.40 (1.92-2.14)       | 1.55 (0.96-2.48)     |                           |
| <b>Active malignancy</b>                         | 9          | 162          | 0.78 (0.38-1.60)       | 0.89 (0.42-1.86)     |                           |
| <b>Current smoker</b>                            | 7          | 162          | 0.63 (0.29-1.39)       | 0.53 (0.23-1.20)     |                           |
| <b>Shock</b>                                     | 24         | 331          | 1.08 (0.68-1.71)       | 0.84 (0.50-1.39)     |                           |
| <b>Respiratory failure</b>                       | 145        | 2132         | 1.22 (0.88-1.70)       | 1.03 (0.72-1.47)     |                           |
| <b>Leukocyte count &gt;11,000/μL</b>             | 54         | 850          | 0.98 (0.70-1.38)       | 0.80 (0.53-1.20)     |                           |
| <b>Platelet count &gt;350 × 10<sup>9</sup>/L</b> | 12         | 284          | 0.58 (0.31-1.08)       | 0.52 (0.27-1.00)     |                           |
| <b>Therapeutic AC on ICU Day 1</b>               | 36         | 429          | 1.46 (0.98-2.16)       | 1.19 (0.77-1.83)     |                           |
| <b>Aspirin on ICU Day 1</b>                      | 22         | 344          | 1.09 (0.68-1.75)       | 1.33 (0.79-2.23)     |                           |
| <b>D-Dimer (mg/L)</b>                            |            |              |                        |                      |                           |
| ≤1.000                                           | 26         | 642          | 1.00                   | 1.00                 |                           |
| 1.001-2.500                                      | 27         | 504          | 1.64 (1.07-2.51)       | 1.79 (1.14-2.81)     |                           |
| 2.501-10.000                                     | 26         | 299          | 2.31 (1.18-4.52)       | 2.70 (1.32-5.53)     |                           |
| >10.000                                          | 24         | 179          | 3.89 (1.63-9.28)       | 4.71 (1.57-14.13)    |                           |

**Figure 3. Interhospital Variation in the Incidence of VTE and Use of Therapeutic Anticoagulation.**

**(A)** Interhospital variation in the incidence of VTE. Among 67 total hospitals treating 3239 patients, 32 hospitals (treating a total of 400 patients) were excluded from this analysis due to having submitted data on fewer than 30 patients each. The risk- and reliability-adjusted incidence of VTE varied across hospitals, with a median incidence of 5.2% and a range of 1.1% at the lowest incidence hospital to 17.7% at the highest. The median odds ratio, which represents the difference in odds of VTE between a randomly-selected lower-VTE incidence hospital and a randomly-selected higher-VTE incidence hospital, was 2.34 (95% CI, 1.65-3.03).

**(B)** Interhospital variation in the use of therapeutic anticoagulation. Among 67 total hospitals treating 3239 patients, 8 hospitals (treating a total of 32 patients) were excluded from this analysis due to having submitted data on fewer than 10 patients each. The risk- and reliability-adjusted rate of therapeutic anticoagulation use varied across hospitals, with a median rate of 39.8% and a range of 15.1% at the lowest-use hospital to 78.5% at the highest. The median odds ratio, which represents the difference in odds of therapeutic anticoagulation use between a randomly-selected lower-use hospital and a randomly-selected higher-use hospital, was 2.08 (95% CI, 1.77-2.39).

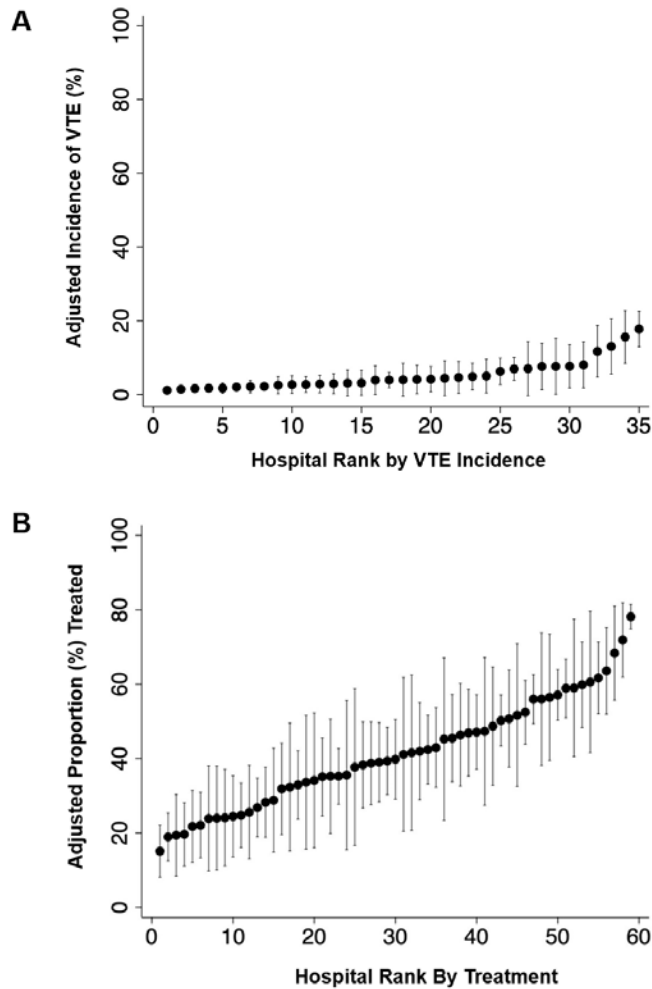

Figure 4. Rates of VTE by Sex across Categories of (A) BMI and (B) D-dimer.

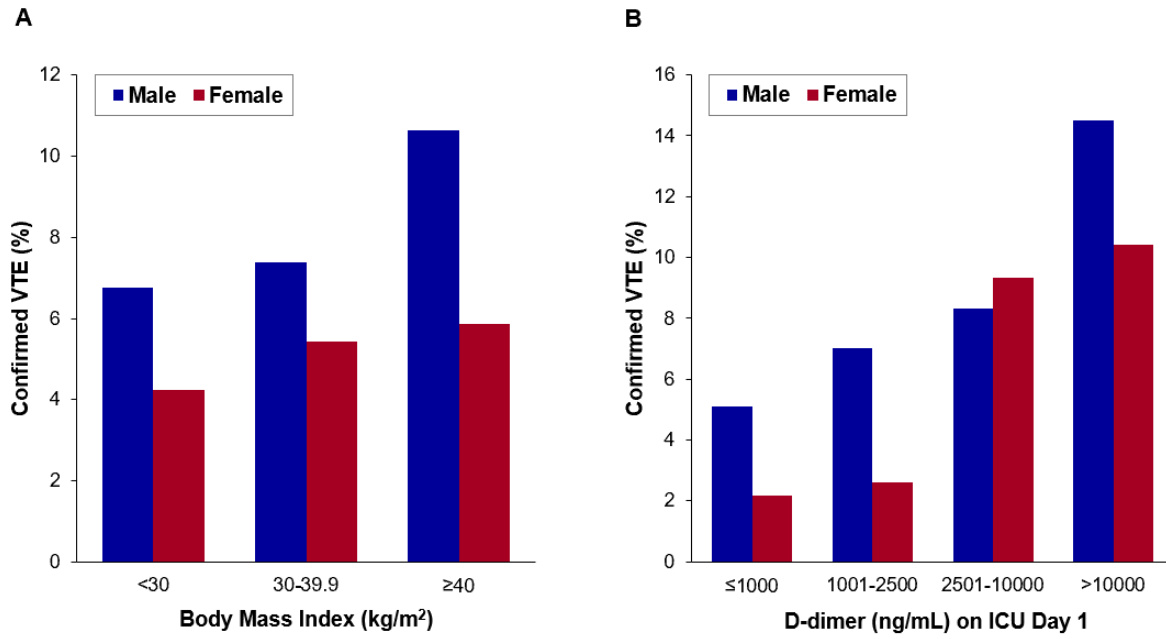

**Figure 5. Standardized Differences Before and After Applying Inverse Probability of Treatment Weighting.** This figure shows the absolute standardized differences for each of the 22 baseline and acute severity-of-illness covariates in the unweighted sample and after applying the weights derived from the inverse probability weighting. A vertical line has been superimposed denoting a standardized difference of 0.2, as effects sizes below 0.2 are often considered to be small <sup>7</sup>, and effects sizes below 0.1 are often considered to be very small <sup>8</sup>. The standardized differences in the unweighted sample exceeded 0.2 for six of the 22 covariates. In contrast, the standardized differences in the weighted sample were below 0.1 for all 22 covariates, indicating that the groups were well balanced across the 22 covariates.

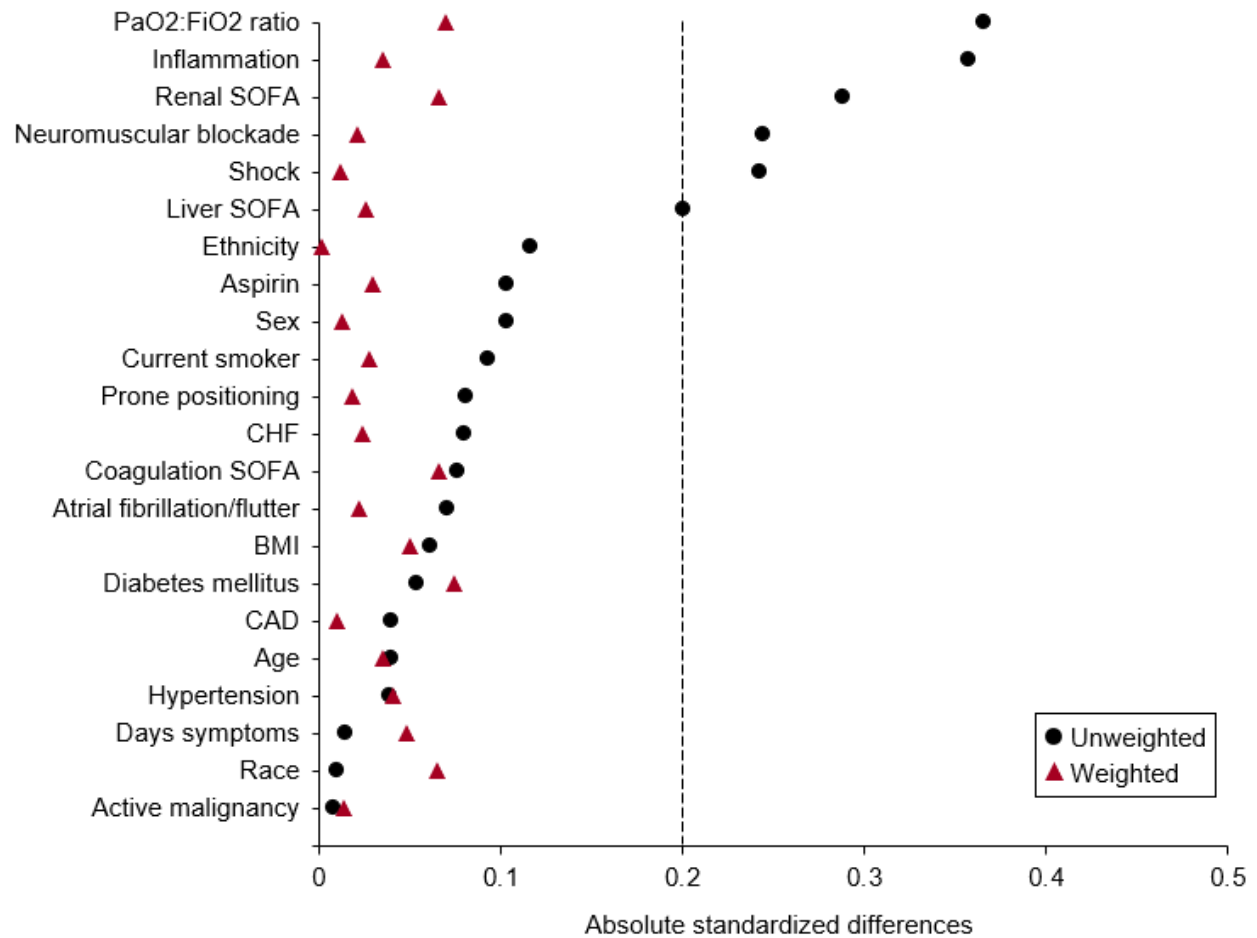

## SUPPLEMENTAL REFERENCES

1. Rubin DB. *Multiple Imputation for Nonresponse in Surveys*. New York: John Wiley & Sons; 1987.
2. Xu S, Ross C, Raebel MA, Shetterly S, Blanchette C, Smith D. Use of stabilized inverse propensity scores as weights to directly estimate relative risk and its confidence intervals. *Value Health*. 2010;13(2):273-277.
3. Vincent JL, Moreno R, Takala J, et al. The SOFA (Sepsis-related Organ Failure Assessment) score to describe organ dysfunction/failure. On behalf of the Working Group on Sepsis-Related Problems of the European Society of Intensive Care Medicine. *Intensive Care Med*. 1996;22(7):707-710.
4. Raith EP, Udy AA, Bailey M, et al. Prognostic Accuracy of the SOFA Score, SIRS Criteria, and qSOFA Score for In-Hospital Mortality Among Adults With Suspected Infection Admitted to the Intensive Care Unit. *JAMA*. 2017;317(3):290-300.
5. Jentzer JC, Bennett C, Wiley BM, et al. Predictive Value of the Sequential Organ Failure Assessment Score for Mortality in a Contemporary Cardiac Intensive Care Unit Population. *J Am Heart Assoc*. 2018;7(6).
6. Aakre C, Franco PM, Ferreyra M, Kitson J, Li M, Herasevich V. Prospective validation of a near real-time EHR-integrated automated SOFA score calculator. *Int J Med Inform*. 2017;103:1-6.
7. Cohen J. *Statistical Power Analysis for the Behavioral Sciences*. 2nd ed. Hillsdale, NJ; 1988.
8. Austin PC, Stuart EA. Moving towards best practice when using inverse probability of treatment weighting (IPTW) using the propensity score to estimate causal treatment effects in observational studies. *Stat Med*. 2015;34(28):3661-3679.

# Confirmation of eligibility

---

Study ID \_\_\_\_\_

## The questions in this instrument will confirm whether the patient is eligible

Once all questions have been answered in an instrument, change the status from "incomplete" to "complete".

Supplemental instructions, FAQ, and tips can be downloaded here. Please read this document carefully before you begin entering data. Note, the FAQ section of this document will be updated every 1-2 days.

[Attachment: "REDCap instructions & FAQ 4-6-20.pdf"]

---

Lab value converter can be downloaded here (to convert the units for CRP, D-Dimer, and lactate, if needed)

[Attachment: "STOP-COVID Lab Value Converter -v2.xlsx"]

---

Adult aged 18 or older?

- Yes  
 No

---

STOP, THIS PATIENT IS NOT ELIGIBLE

---

Laboratory-confirmed diagnosis of COVID-19?

- Yes  
 No

---

STOP, THIS PATIENT IS NOT ELIGIBLE

---

Date the positive COVID-19 test was obtained

-Refers to the date the patient was tested, not the date the result came back

-If multiple tests were sent, provide the date of the initial positive test, even if it was obtained at an outside facility

-Ok to use an estimate if exact date unavailable

---

---

Hospitalized in the ICU for illness related to COVID-19?

- Yes
- No

Do not include patients admitted to the ICU for reasons unrelated to COVID-19 who later tested positive on "routine surveillance" only and never showed signs or symptoms consistent with COVID-19.

Patients in non-ICU rooms that have been "converted" into ICU rooms for surge capacity are eligible under any of the following conditions:

- a) being treated by an ICU team
- b) receiving invasive mechanical ventilation or ECMO
- c) receiving continuous renal replacement therapy (e.g., CVVH)
- d) receiving vasopressors/inotropes or mechanical cardiac support (e.g., LVAD) in a room where this would traditionally not be permitted

---

STOP, THIS PATIENT IS NOT ELIGIBLE

---

THIS PATIENT IS ELIGIBLE, PROCEED WITH DATA ENTRY

---

Additional Notes (if any)

---



# Institutional Data

---

Enter your name

The name of the person entering data, not the name of the patient

---

---

Enter your email address

---

---

Was the patient admitted to the main hospital within your medical center, or to a satellite/affiliate of the main hospital?

If admitted to one hospital and then transferred to another, please review the answer to Question7 in the FAQ section of the REDCap instructions document

- Main Hospital  
 Satellite/affiliate

---

Enter name of the main hospital

---

---

Enter name of satellite/affiliate

---

---

How many regular adult ICU beds does this hospital have?

-Do not include surge capacity beds

-If the patient was admitted to a satellite/affiliate hospital, only enter the #ICU beds at that specific site

---

---

Indicate the state (2-letter abbreviation) in which the hospital is located

---

---

Additional Notes (if any)

---

# Demographics, Symptoms, Comorbidities, Home Medications

Age (in years)

---

Gender

- Male  
 Female

Ethnicity

- Hispanic or Latino  
 Not Hispanic or Latino  
 Unknown / Not Reported

Race

Do not select, "Unknown / Not Reported" unless this information is truly unavailable

- White  
 Black or African American  
 Asian  
 American Indian/Alaska Native  
 Native Hawaiian or Other Pacific Islander  
 More Than One Race  
 Unknown / Not Reported

Pregnant at the time of ICU admission?

- Yes  
 No

How many weeks pregnant on ICU admission?

(Round up or down to the nearest integer value)

Enter the outcome of the fetus by the end of the hospitalization (e.g., "both the mother and fetus survived the hospitalization", or "fetus terminated at week XXX due to XXX", etc.)

---

Source of admission to the ICU

- Emergency department  
 Hospital ward  
 Transfer from another hospital  
 Other

Suspected setting in which COVID-19 infection occurred

\*Healthcare worker is defined as a doctor, nurse, technician, or other medical professional who provides direct care to patients (do not include ancillary staff such as clerks, pharmacists, or kitchen/cleaning staff)

- Community-acquired  
 Nosocomial  
 Occupational (healthcare worker)\*  
 Unknown

Type of healthcare worker

- Doctor  
 Nurse  
 Other

Date symptoms first began?

Ok to use an estimate if exact date is unavailable

---

Symptom(s) that began prior to ICU admission (select all that apply)  
Include symptoms that began at home as well as those that began in the hospital prior to ICU admission

- Cough
- Sputum production
- Hemoptysis
- Sore throat
- Nasal congestion
- Headache
- Fever
- Chills
- Shortness of breath
- Nausea or vomiting
- Diarrhea
- Myalgia or arthralgia
- Confusion or altered mental status
- Fatigue or malaise
- None of the above

Other symptom(s) that began prior to ICU admission?  
Examples include chest pain/tightness, dizziness, and anosmia (lack of smell)

---

Cardiovascular and pulmonary comorbidities prior to ICU admission

\*CAD includes any history of angina, myocardial infarction, or coronary artery bypass graft surgery

\*\*CHF includes both HFrEF and HFpEF

- Diabetes mellitus
- Hypertension
- Coronary artery disease (CAD)\*
- Congestive heart failure (CHF)\*\*
- Atrial fibrillation/flutter
- COPD
- Asthma
- Other lung disease
- None of the above

Was the diabetes insulin-dependent or non-insulin-dependent?

- Insulin-dependent
- Non-insulin-dependent

Enter the other lung disease

---

Tobacco smoking status  
Do not include vaping or smoking of non-tobacco products

- Non-smoker
- Former smoker
- Current smoker
- Unknown

How many pack-years of smoking history?  
If not available enter, "N/A"

---

History of alcohol abuse

- Yes
- No
- Unknown

Currently homeless

- Yes
- No
- Unknown

Additional comorbidities prior to ICU admission

\*Chronic Kidney Disease (CKD) is defined as a baseline eGFR < 60 on at least two consecutive values at least 12 weeks apart prior to hospital admission. If not available, defined as per medical history

\*\*Chronic liver disease includes cirrhosis, alcohol-related liver disease, nonalcoholic fatty liver disease, autoimmune hepatitis, hepatitis B or hepatitis C, primary biliary cirrhosis, and others

\*\*\*Active malignancy is defined as any malignancy (other than non-melanoma skin cancer) that was treated in the prior year

- CKD\*
- ESRD on hemodialysis or peritoneal dialysis
- Chronic liver disease\*\*
- HIV/AIDS
- Active malignancy\*\*\*
- Solid organ transplant
- Bone marrow transplant
- Other immunodeficiency
- None of the above

Dialysis modality prior to hospital admission

- In-center hemodialysis
- Home hemodialysis
- Peritoneal dialysis

Type of vascular access used prior to hospital admission

- Catheter
- Arteriovenous fistula (AVF)
- Arteriovenous graft (AVG)

How long had the patient been receiving maintenance dialysis therapy prior to ICU admission?

- < 6 months
- Between 6 and 12 months
- Between 1 and 2.9 years
- Between 3 and 4.9 years
- 5 or more years
- Unknown

Does the patient have a history of a failed kidney transplant?

- Yes
- No
- Unknown

Type of chronic liver disease

- Alcohol-related
- Non-alcoholic fatty liver disease/NASH
- Hepatitis B virus
- Hepatitis C virus
- Autoimmune hepatitis
- Primary biliary cirrhosis
- Other

Enter other chronic liver disease

\_\_\_\_\_

Type of malignancy

- Lung cancer
- Breast cancer
- Colorectal cancer
- Prostate cancer
- Gastric cancer
- Pancreatic cancer
- Melanoma
- Ovarian cancer
- Brain cancer
- Other cancer

Enter the other malignancy

\_\_\_\_\_

---

Type of solid organ transplant

- Kidney  
 Liver  
 Heart  
 Lung  
 Other
- 

Enter the other solid organ transplant type

---

Enter the other immunodeficiency

---

At least one baseline serum creatinine value available?  
Defined as a value between 365 to 7 days PRIOR to hospitalization

- Yes  
 No
- 

Baseline serum creatinine (mg/dl)  
Defined as the LOWEST value within 365 to 7 days prior to hospital admission

---

Serum creatinine (mg/dl) on HOSPITAL admission

---

Anti-hypertensive meds prior to hospital admission (select all that apply)  
ACE-Is include lisinopril, fosinopril, captopril, and others  
ARBs include losartan, valsartan, irbesartan, and others  
MRAs include spironolactone and eplerenone

- ACE-I  
 ARB  
 Mineralocorticoid receptor antagonist (MRA)  
 Beta-blocker  
 Other anti-hypertensive  
 None of the above
- 

Enter the other anti-hypertensive(s)  
If entering more than one, separate with commas

---

Other meds prior to hospital admission (select all that apply).

Note: only refers to home meds (don't include meds started at an outside hospital)

Statins include atorvastatin, pravastatin, rosuvastatin, and others

NSAIDs include ibuprofen (Advil, Motrin), naproxen (Aleve), and others

For vitamins C and D, do not include if the only source was a multivitamin

\*Include these meds if any were taken within 1 week prior to hospital admission

- Statin  
 NSAID  
 Aspirin  
 Vitamin C  
 Vitamin D  
 Chloroquine\*  
 Hydroxychloroquine\*  
 Azithromycin\*  
 None of the above

---

Therapeutic anticoagulants prior to admission  
Do not include anti-platelet agents such as aspirin  
or clopidogrel (Plavix) as "other anticoagulant"

- Warfarin (Coumadin)
- Lovenox (Enoxaparin)
- Apixaban (Eliquis)
- Rivaroxaban (Xarelto)
- Other anticoagulant
- None of the above

---

Select if the patient received any of the following  
immunosuppressive medications in the 30 days prior  
to ICU admission

\*Do not include immunotherapy, such as immune  
checkpoint inhibitors (e.g., nivolumab)

\*\*CNIs include tacrolimus and cyclosporine; do not  
include CNIs applied topically (i.e., as an ointment)

- Chemotherapy\*
- Corticosteroids >10mg prednisone/day (or  
equivalent)
- Calcineurin inhibitor (CNI)\*\*
- Mycophenolate mofetile (Cellcept)
- Azathioprine (Imuran)
- Rituximab
- Other major immunosuppressive therapy
- None of the above

---

Enter the other major immunosuppressive medication(s)  
the patient was taking

---

---

Additional Notes (if any)

Please do not use this space to enter additional  
medications or comorbidities

---

# Vital Signs And Severity-of-Illness On ICU Day 1

---

Unless otherwise specified, the timing of the data below refers to ICU Day1, defined as the 24h period from midnight PRIOR to ICU admission to midnight AFTER ICU admission. For example, if a patient is admitted to an ICU at 10pm, 22 of the 24 hours for ICU Day1 would actually be from prior to ICU arrival (e.g., from the ED or hospital ward). See timeline in the "REDCap instructions" PDF for additional details.

---

Weight on ICU Day1 (or closest value prior)

-Can enter in either kg or lbs

-If none available, enter, "N/A"

---

Units for weight

Be sure to select the correct unit

Kilograms

Pounds

Height

-Can enter in either cm or inches

-If not available, enter, "N/A"

---

Units for height

Be sure to select the correct unit

Centimeters

Inches

Date of hospital admission

If hospitalized elsewhere and then transferred to your hospital, enter the date of the initial hospitalization (e.g., if initially at "Hospital A" and then transferred to "Hospital B", enter the date admitted to Hospital A)

---

Date of ICU admission

-If admitted to an outside/satellite/affiliate ICU and then transferred to an ICU at your hospital, enter the date admitted to the ICU at your hospital  
-If the patient had multiple ICU admissions at your hospital during their overall admission for COVID-19, enter the date of the initial ICU admission at your hospital

---

Admitted to a COVID-specific ICU?

Defined as an ICU where all patients have suspected or confirmed COVID-19

Yes

No

## Type of ICU

A non-ICU bed qualifies as a having been "converted" to an ICU bed for surge capacity if any of the following are present:

- a) being treated by an ICU team
- b) receiving invasive mechanical ventilation or ECMO
- c) receiving continuous renal replacement therapy (e.g., CVVH)
- d) receiving vasopressors/inotropes or mechanical cardiac support (e.g., LVAD) in a room where this would traditionally not be permitted

- Medical ICU
- Cardiac ICU
- Surgical/Trauma/Burn ICU
- Neuro ICU
- Non-ICU bed converted into an ICU bed for surge capacity

Highest temperature on ICU Day1

Can enter in either F or C

\_\_\_\_\_

Units for temperature

- Fahrenheit
- Celsius

Lowest systolic blood pressure on ICU Day1

Irrespective of whether on pressors or not

\_\_\_\_\_

Highest heart rate on ICU Day1

\_\_\_\_\_

Highest respiratory rate on ICU Day1

Irrespective of whether on ventilator not

\_\_\_\_\_

What type of mechanical ventilation/oxygen delivery did the patient require on ICU Day1?

-Invasive mechanical ventilation refers to mechanical ventilation delivered via endotracheal or tracheal tube

-If more than one, select the highest level of support

-If nasal cannula or regular facemask only, select "none of the above"

- Invasive mechanical ventilation
- BiPaP or CPAP
- High-flow nasal cannula or non-rebreather mask
- None of the above

Did the patient have any confirmed or suspected infection(s) on ICU Day1 other than COVID-19?

\*Only select bacterial pneumonia if the patient had positive cultures (e.g., sputum or blood), a positive urine antigen for pneumococcus or legionella, or a new infiltrate on chest imaging (CXR or CT) suspected to be separate from COVID-related pneumonia

- Bacterial Pneumonia\*
- Viral respiratory infection\*\*
- Urosepsis
- Biliary sepsis
- Cellulitis
- Bacteremia or endocarditis\*\*\*
- Other
- None of the above

\*\*Examples of viral respiratory infections include influenza, parainfluenza, and RSV

\*\*\*Only if confirmed by blood cultures and/or cardiac imaging

Enter the viral respiratory infection

\_\_\_\_\_



---

Enter the other infection

---

---

Enter the number of antibiotics the patient was treated with on ICU Day1

-Do not include antivirals, antifungals, or antimalarials (e.g., chloroquine or hydroxychloroquine).

-Commonly used antibiotics include vancomycin, piperacillin-tazobactam (Zosyn), azithromycin, cephalosporins, quinolones, etc.

0  
 1  
 2  
 3  
 4  
 5 or more

---

---

Was the patient treated with oseltamivir (Tamiflu) on ICU Day1?

Includes patients who were started on Tamiflu PRIOR to ICU Day1, as long as they continued to receive it on ICU Day1

Yes  
 No

---

---

Enter procalcitonin level (ng/ml) if checked within 24h before or 24h after admission to the ICU

-If more than one available, enter the value closest to ICU admission

-If none available, enter "N/A"

-If < assay, enter 0

-If > assay, enter the upper limit of the assay and do not include the ">" symbol

---

---

Enter CPK level (U/L) if checked within 24h before or 24h after admission to the ICU

-If more than one available, enter the value closest to ICU admission

-If none available, enter "N/A"

-If < assay, enter 0

-If > assay, enter the upper limit of the assay

---

---

Enter sodium level (mEq/L) if checked within 24h before or 24h after admission to the ICU

-If more than one available, enter the value closest to ICU admission

-If none available, enter "N/A"

---

---

Altered mental status on ICU Day1?

For patients who are intubated/sedated, use the most recent exam prior to intubation/sedation

Yes  
 No  
 Data not available

---

---

Additional notes (if any)

---

# Longitudinal Data On Labs And Physiologic Parameters in the First 14 Days following ICU Admission

The questions below refer to the first 14 days following ICU admission. Even if the patient was in the ICU for less than 14 days and was transferred to the hospital floor, continue to enter data for the full 14 days or until discharged from the hospital or death (whichever occurs first). We highly recommend waiting to fill out this instrument (and future instruments) until the first of death, hospital discharge, at least 14 days of survival data is available.

Each ICU Day is a discrete 24h period, from midnight to midnight. ICU Day1 refers to the 24h period from the midnight PRIOR to ICU admission to the midnight AFTER ICU admission. For example, if a patient was admitted to an ICU at 10pm, 22 of the 24 hours for ICU Day1 would actually be from prior to arrival in the ICU. See timeline in the "REDCap instructions" PDF for additional details.

If more than one lab value is available on any given day, use the first one. If there is no value available that day, leave the field blank (i.e., do NOT write, "N/A" here)

-If a lab is below assay (e.g., Troponin < 6), enter 0

-If a lab is above assay (e.g., IL-6 > 3,000), enter the upper limit of the assay (e.g., "3,000")

-Do not include any units or "%" in these fields; only enter numbers

-If both an arterial and venous lactate are available on the same day, enter the arterial value, otherwise enter the venous value

Please pay close attention to the units, particularly for CRP, D-dimer, and troponin, and convert to the units we are using if needed. For example, if your lab reports troponin in ng/ml, multiply the values by 1,000 to convert to ng/L

Labs

Physiologic parameters

Labs 2

Physiologic parameters 2

Mechanical support dates

|                                   | ICU Day1                 | Day2                     | Day3                     | Day4                     | Day5                     | Day6                     | Day7                     |
|-----------------------------------|--------------------------|--------------------------|--------------------------|--------------------------|--------------------------|--------------------------|--------------------------|
| Invasive Mechanical Ventilation*  | <input type="checkbox"/> |
| ECMO                              | <input type="checkbox"/> |
| Renal Replacement Therapy (RRT)** | <input type="checkbox"/> |
| Mechanical Cardiac Support***     | <input type="checkbox"/> |

Check the box if the patient received any of the associated therapies on that day

\*If a patient received any invasive mechanical ventilation that day, check the box, even if they were extubated that day.

\*\*For patients who received RRT intermittently (e.g., every other day), continue to check the box as long as they are RRT-dependent, even if they didn't actually receive RRT on that specific day

\*\*\*Includes Impella, Intra-aortic balloon pump (IABP), LVAD, RVAD

Mechanical support dates 2

|                                   | Day8                     | Day9                     | Day10                    | Day11                    | Day12                    | Day13                    | Day14                    |
|-----------------------------------|--------------------------|--------------------------|--------------------------|--------------------------|--------------------------|--------------------------|--------------------------|
| Invasive Mechanical Ventilation*  | <input type="checkbox"/> |
| ECMO                              | <input type="checkbox"/> |
| Renal Replacement Therapy (RRT)** | <input type="checkbox"/> |
| Mechanical Cardiac Support***     | <input type="checkbox"/> |

Type of ECMO

- Venovenous (V-V)  
 Venovenous (V-V)  
 Venovenous (V-V)  
 Venovenous (V-V)  
 Venovenous (V-V)

Was the ECMO successfully decannulated (removed) during the first 14 days following ICU admission? If the ECMO was decannulated for palliative purposes, select "no"

- Yes  
 No

Date ECMO was decannulated

\_\_\_\_\_

Initial mode of RRT

- Continuous (CRRT) - 24h/day  
 Continuous (CRRT) - 12h/day or less  
 Intermittent hemodialysis  
 Peritoneal dialysis  
 Other

Type of mechanical cardiac support (select all that apply)

- Impella  
 Intra-aortic balloon pump (IABP)  
 LVAD  
 RVAD  
 Other

Enter other mechanical cardiac support

\_\_\_\_\_

Mech support dates 1

\_\_\_\_\_

Mech support dates 2

\_\_\_\_\_

Mech support dates 3

\_\_\_\_\_

Mech support dates 4

\_\_\_\_\_

Mech support dates 5

\_\_\_\_\_

Mech support dates 6

\_\_\_\_\_

Mech support dates 7

\_\_\_\_\_

---

Mech support dates 8

---

---

Mech support dates 9

---

---

Mech support dates 10

---

---

Mech support dates 11

---

---

Mech support dates 12

---

---

Mech support dates 13

---

---

Mech support dates 14

---

---

Labs Date Day 1

---

---

Labs Date Day 2

---

---

Labs Date Day 3

---

---

Labs Date Day 4

---

---

Labs Date Day 5

---

---

Labs Date Day 6

---

---

Labs Date Day 7

---

---

Labs Date Day 8

---

---

Labs Date Day 9

---

---

Labs Date Day 10

---

---

Labs Date Day 11

---

---

Labs Date Day 12

---

---

Labs Date Day 13

---

---

Labs Date Day 14

---

---

White cell count day 1

---

---

White cell count day 2

---

---

White cell count day 3

---

---

White cell count day 4

---

---

White cell count day 5

---

---

White cell count day 6

---

---

White cell count day 7

---

---

White cell count day 8

---

---

White cell count day 9

---

---

White cell count day 10

---

---

White cell count day 11

---

---

White cell count day 12

---

---

White cell count day 13

---

---

White cell count day 14

---

---

Lymphocyte percentage day 1

---

---

Lymphocyte percentage day 2

---

---

Lymphocyte percentage day 3

---

---

Lymphocyte percentage day 4

---

---

Lymphocyte percentage day 5

---

---

Lymphocyte percentage day 6

---

---

Lymphocyte percentage day 7

---

---

Lymphocyte percentage day 8

---

---

Lymphocyte percentage day 9

---

---

Lymphocyte percentage day 10

---

---

Lymphocyte percentage day 11

---

---

Lymphocyte percentage day 12

---

---

Lymphocyte percentage day 13

---

---

Lymphocyte percentage day 14

---

---

Hemoglobin Day 1

---

---

Hemoglobin Day 2

---

---

Hemoglobin Day 3

---

---

Hemoglobin Day 4

---

---

Hemoglobin Day 5

---

---

Hemoglobin Day 6

---

---

Hemoglobin Day 7

---

---

Hemoglobin Day 8

---

---

Hemoglobin Day 9

---

---

Hemoglobin Day 10

---

---

Hemoglobin Day 11

---

---

Hemoglobin Day 12

---

---

Hemoglobin Day 13

---

---

Hemoglobin Day 14

---

---

Platelet count day 1

---

---

Platelet count day 2

---

---

Platelet count day 3

---

---

Platelet count day 4

---

---

Platelet count day 5

---

---

Platelet count day 6

---

---

Platelet count day 7

---

---

Platelet count day 8

---

---

Platelet count day 9

---

---

Platelet count day 10

---

---

Platelet count day 11

---

---

Platelet count day 12

---

---

Platelet count day 13

---

---

Platelet count day 14

---

---

Creatinine Day 1

---

---

Creatinine day 2

---

---

Creatinine day 3

---

---

Creatinine day 4

---

---

Creatinine day 5

---

---

Creatinine day 6

---

---

Creatinine day 7

---

---

Creatinine day 8

---

---

Creatinine day 9

---

---

Creatinine day 10

---

---

Creatinine day 11

---

---

Creatinine day 12

---

---

Creatinine day 13

---



---

Creatinine day 14

---

---

Albumin day 1

---

---

Albumin day 2

---

---

Albumin day 3

---

---

Albumin day 4

---

---

Albumin day 5

---

---

Albumin day 6

---

---

Albumin day 7

---

---

Albumin day 8

---

---

Albumin day 9

---

---

Albumin day 10

---

---

Albumin day 11

---

---

Albumin day 12

---

---

Albumin day 13

---

---

Albumin day 14

---

---

AST day 1

---

---

AST day 2

---

---

AST day 3

---

---

AST day 4

---

---

AST day 5

---

---

AST day 6

---

---

AST day 7

---

---

AST day 8

---

---

AST day 9

---

---

AST day 10

---

---

AST day 11

---

---

AST day 12

---

---

AST day 13

---

---

AST day 14

---

---

ALT day 1

---

---

ALT day 2

---

---

ALT day 3

---

---

ALT day 4

---

---

ALT day 5

---

---

ALT day 6

---

---

ALT day 7

---

---

ALT day 8

---

---

ALT day 9

---

---

ALT day 10

---

---

ALT day 11

---

---

ALT day 12

---

---

ALT day 13

---

---

ALT day 14

---

---

Total bilirubin day 1

---

---

Total bilirubin day 2

---

---

Total bilirubin day 3

---

---

Total bilirubin day 4

---

---

Total bilirubin day 5

---

---

Total bilirubin day 6

---

---

Total bilirubin day 7

---

---

Total bilirubin day 8

---

---

Total bilirubin day 9

---

---

Total bilirubin day 10

---

---

Total bilirubin day 11

---

---

Total bilirubin day 12

---

---

Total bilirubin day 13

---

---

Total bilirubin day 14

---

---

Lactate day 1

---

---

Lactate day 2

---

---

Lactate day 3

---

---

Lactate day 4

---

---

Lactate day 5

---

---

Lactate day 6

---

---

Lactate day 7

---

---

Lactate day 8

---

---

Lactate day 9

---

---

Lactate day 10

---

---

Lactate day 11

---

---

Lactate day 12

---

---

Lactate day 13

---

---

Lactate day 14

---

---

CRP day 1

---

---

CRP day 2

---

---

CRP day 3

---

---

CRP day 4

---

---

CRP day 5

---

---

CRP day 6

---

---

CRP day 7

---

---

CRP day 8

---

---

CRP day 9

---

---

CRP day 10

---

---

CRP day 11

---

---

CRP day 12

---

---

CRP day 13

---

---

CRP day 14

---

---

IL-6 day 1

---

---

IL-6 day 2

---

---

IL-6 day 3

---

---

IL-6 day 4

---

---

IL-6 day 5

---

---

IL-6 day 6

---

---

IL-6 day 7

---

---

IL-6 day 8

---

---

IL-6 day 9

---

---

IL-6 day 10

---

---

IL-6 day 11

---

---

IL-6 day 12

---

---

IL-6 day 13

---

---

IL-6 day 14

---

---

Arterial pH day 1

---

---

Arterial pH day 2

---

---

Arterial pH day 3

---

---

Arterial pH day 4

---

---

Arterial pH day 5

---

---

Arterial pH day 6

---

---

Arterial pH day 7

---

---

Arterial pH day 8

---

---

Arterial pH day 9

---

---

Arterial pH day 10

---

---

Arterial pH day 11

---

---

Arterial pH day 12

---

---

Arterial pH day 13

---

---

Arterial pH day 14

---

---

Fibrinogen day 1

---

---

Fibrinogen day 2

---

---

Fibrinogen day 3

---

---

Fibrinogen day 4

---

---

Fibrinogen day 5

---

---

Fibrinogen day 6

---

---

Fibrinogen day 7

---

---

Fibrinogen day 8

---

---

Fibrinogen day 9

---

---

Fibrinogen day 10

---

---

Fibrinogen day 11

---

---

Fibrinogen day 12

---

---

Fibrinogen day 13

---

---

Fibrinogen day 14

---

---

D dimer day 1

---

---

D dimer day 2

---

---

D dimer day 3

---

---

D dimer day 4

---

---

D dimer day 5

---

---

D dimer day 6

---

---

D dimer day 7

---

---

D dimer day 8

---

---

D dimer day 9

---

---

D dimer day 10

---

---

D dimer day 11

---

---

D dimer day 12

---

---

D dimer day 13

---

---

D dimer day 14

---

---

Ferritin Day 1

---

---

Ferritin Day 2

---

---

Ferritin Day 3

---



---

Ferritin Day 4

---

---

Ferritin Day 5

---

---

Ferritin Day 6

---

---

Ferritin Day 7

---

---

Ferritin Day 8

---

---

Ferritin Day 9

---

---

Ferritin Day 10

---

---

Ferritin Day 11

---

---

Ferritin Day 12

---

---

Ferritin Day 13

---

---

Ferritin Day 14

---

---

Troponin T day 1

---

---

Troponin T day 2

---

---

Troponin T day 3

---

---

Troponin T day 4

---

---

Troponin T day 5

---

---

Troponin T day 6

---

---

Troponin T day 7

---

---

Troponin T day 8

---

---

Troponin T day 9

---

---

Troponin T day 10

---

---

Troponin T day 11

---

---

Troponin T day 12

---

---

Troponin T day 13

---

---

Troponin T day 14

---

---

Troponin I day 1

---

---

Troponin I day 2

---

---

Troponin I day 3

---

---

Troponin I day 4

---

---

Troponin I day 5

---

---

Troponin I day 6

---

---

Troponin I day 7

---

---

Troponin I day 8

---

---

Troponin I day 9

---

---

Troponin I day 10

---

---

Troponin I day 11

---

---

Troponin I day 12

---

---

Troponin I day 13

---

---

Troponin I day 14

---

---

PaO2 day 1\*

---

---

PaO2 day 2\*

---

---

PaO2 day 3\*

---

---

PaO2 day 4\*

---

---

PaO2 day 5\*

---

---

PaO2 day 6\*

---

---

PaO2 day 7\*

---

---

PaO2 day 8\*

---

---

PaO2 day 9\*

---

---

PaO2 day 10\*

---

---

PaO2 day 11\*

---

---

PaO2 day 12\*

---

---

PaO2 day 13\*

---

---

PaO2 day 14\*

---

---

FiO2 day 1

---

---

FiO2 day 2

---

---

FiO2 day 3

---

---

FiO2 day 4

---

---

FiO2 day 5

---

---

FiO2 day 6

---

---

FiO2 day 7

---

---

FiO2 day 8

---

---

FiO2 day 9

---

---

FiO2 day 10

---

---

FiO2 day 11

---

---

FiO2 day 12

---

---

FiO2 day 13

---

---

FiO2 day 14

---

---

PEEP day 1

---

---

PEEP day 2

---

---

PEEP day 3

---

---

PEEP day 4

---

---

PEEP day 5

---

---

PEEP day 6

---

---

PEEP day 7

---

---

PEEP day 8

---

---

PEEP day 9

---

---

PEEP day 10

---

---

PEEP day 11

---

---

PEEP day 12

---

---

PEEP day 13

---

---

PEEP day 14

---

---

24h Urine Output Day 1

---

---

24h Urine Output Day 2

---

---

24h Urine Output Day 3

---

---

24h Urine Output Day 4

---

---

24h Urine Output Day 5

---

---

24h Urine Output Day 6

---

---

24h Urine Output Day 7

---

---

24h Urine Output Day 8

---

---

24h Urine Output Day 9

---

---

24h Urine Output Day 10

---

---

24h Urine Output Day 11

---

---

24h Urine Output Day 12

---

---

24h Urine Output Day 13

---

---

24h Urine Output Day 14

---

---

Max #vasopressors/inotropes day 1

---

---

Max #vasopressors/inotropes day 2

---

---

Max #vasopressors/inotropes day 3

---

---

Max #vasopressors/inotropes day 4

---

---

Max #vasopressors/inotropes day 5

---

---

Max #vasopressors/inotropes day 6

---

---

Max #vasopressors/inotropes day 7

---

---

Max #vasopressors/inotropes day 8

---

---

Max #vasopressors/inotropes day 9

---

---

Max #vasopressors/inotropes day 10

---

---

Max #vasopressors/inotropes day 11

---

---

Max #vasopressors/inotropes day 12

---

---

Max #vasopressors/inotropes day 13

---

---

Max #vasopressors/inotropes day 14

---

Additional Notes (if any)

---

# Acute Organ Injury in the First 14 Days Following ICU Admission

The questions below refer to the first 14 days following ICU admission. Even if the patient was in the ICU for less than 14 days and was transferred to the hospital floor, continue to enter data for the full 14 days or until discharged from the hospital (whichever occurs first)

Each of the acute organ injuries in this section is defined based on clinical suspicion by the treating provider(s)

Did ARDS occur within the first 14 days following ICU admission?

- Yes  
 No

ARDS defined as per chart review/progress notes

Date ARDS was first confirmed/suspected  
Do not enter any dates prior to ICU Day1; if ARDS started prior to ICU Day1 and was still present on ICU Day1, enter the ICU Day1 date

\_\_\_\_\_

New congestive heart failure (CHF) in the first 14 days following ICU admission?

- Yes  
 No  
 N/A (CHF present at baseline)

Enter the left ventricular ejection fraction at the time of the new heart failure  
-Enter as an integer (0-100) and without % sign  
-If unavailable, enter, "N/A"

\_\_\_\_\_

Date CHF was first confirmed/suspected  
Do not enter any dates prior to ICU Day1; if CHF started prior to ICU Day1 and was still present on ICU Day1, enter the ICU Day1 date

\_\_\_\_\_

Arrhythmia during the first 14 days following ICU admission?  
Do not enter any dates prior to ICU Day1; if arrhythmia started prior to ICU Day1 and was still present on ICU Day1, enter the ICU Day1 date

- Atrial fibrillation/flutter  
 Ventricular tachycardia (VT)  
 Ventricular fibrillation  
 None of the above

Sustained or non-sustained VT?  
Sustained is defined as requiring shocks or anti-arrhythmic therapy

- Sustained  
 Non-sustained

Date atrial fibrillation/flutter first developed  
Do not enter any dates prior to ICU Day1; if atrial fibrillation/flutter started prior to ICU Day1 and was still present on ICU Day1, enter the ICU Day1 date

\_\_\_\_\_



---

Date VT first developed

Do not enter any dates prior to ICU Day1; if VT started prior to ICU Day1 and was still present on ICU Day1, enter the ICU Day1 date

---

Date ventricular fibrillation first developed

Do not enter any dates prior to ICU Day1; if ventricular fibrillation started prior to ICU Day1 and was still present on ICU Day1, enter the ICU Day1 date

---

New myocarditis and/or pericarditis in the first 14 days following ICU admission?  
Defined as per chart review

- Myocarditis only  
 Pericarditis only  
 Both  
 Neither
- 

Date myocarditis or pericarditis first developed

Do not enter any dates prior to ICU Day1; if myocarditis or pericarditis started prior to ICU Day1 and was still present on ICU Day1, enter the ICU Day1 date

---

Cardiac arrest in the first 14 days following ICU admission?

- Yes  
 No
- 

Was CPR administered?

\*Some hospitals have prohibited CPR in COVID patients to protect healthcare workers

- Yes  
 No because they were DNR  
 No because of hospital policy\*
- 

Date of first cardiac arrest

---

New infection in the first 14 days following ICU admission?

Defined as a suspected or confirmed new infection other than COVID-19 that developed after admission to the ICU

- Yes  
 No

Should be primarily based on culture data (e.g., sputum, blood, urine, and stool), though other infections can also be included (e.g., cellulitis, abscess) if there was a strong clinical suspicion, even in the absence of positive cultures

Do not enter any dates prior to ICU Day1; if the new infection started prior to ICU Day1 and was still present on ICU Day1, enter the ICU Day1 date

---

What infection(s)?

- Pneumonia (including ventilator-associated pneumonia)  
 Urosepsis  
 Biliary sepsis  
 Bacteremia  
 Other

---

Enter other infection

\_\_\_\_\_

---

Date pneumonia developed

Do not enter any dates prior to ICU Day1; if pneumonia started prior to ICU Day1 and was still present on ICU Day1, enter the ICU Day1 date

\_\_\_\_\_

---

Date urosepsis developed

Do not enter any dates prior to ICU Day1; if urosepsis started prior to ICU Day1 and was still present on ICU Day1, enter the ICU Day1 date

\_\_\_\_\_

---

Date biliary sepsis developed

Do not enter any dates prior to ICU Day1; if biliary sepsis started prior to ICU Day1 and was still present on ICU Day1, enter the ICU Day1 date

\_\_\_\_\_

---

Date bacteremia developed

Do not enter any dates prior to ICU Day1; if bacteremia started prior to ICU Day1 and was still present on ICU Day1, enter the ICU Day1 date

\_\_\_\_\_

---

Date other infection developed

Do not enter any dates prior to ICU Day1; if other infection started prior to ICU Day1 and was still present on ICU Day1, enter the ICU Day1 date

\_\_\_\_\_

---

New thromboembolic event in the first 14 days following ICU admission (select all that apply)

- Deep venous thrombosis (DVT)  
 Pulmonary embolism (PE)  
 Stroke  
 Heparin-induced thrombocytopenia (H.I.T.)  
 Other thromboembolic event  
 None of the above

---

Enter other thromboembolic event

\_\_\_\_\_

---

Date of DVT

Do not enter any dates prior to ICU Day1; if the DVT started prior to ICU Day1 and was still present on ICU Day1, enter the ICU Day1 date

\_\_\_\_\_

---

DVT confirmed on diagnostic imaging (e.g., ultrasound)?

- Yes  
 No

Location of the DVT (select all that apply)

Lower extremity PROXIMAL refers to the thigh/knee (e.g., inferior vena cava, iliac, common femoral/superficial femoral/deep femoral, or popliteal veins)

Lower extremity DISTAL refers to the calf (e.g., peroneal, tibial, gastrocnemius, soleal, calf perforator veins)

Upper extremity or neck includes the internal jugular and subclavian veins

Other includes abdominal vein thrombosis, cerebral venous sinus thrombosis, and others

Superficial Veins (if in isolation, enter as "other thrombosis" not DVT)

Great saphenous vein Small saphenous vein Reticular veins

- Lower extremity PROXIMAL  
 Lower extremity DISTAL  
 Upper extremity or neck  
 Other

Date of Pulmonary Embolism (PE)

Do not enter any dates prior to ICU Day1; if the PE started prior to ICU Day1 and was still present on ICU Day1, enter the ICU Day1 date

\_\_\_\_\_

Was the pulmonary embolism confirmed on imaging?

- Yes - by CT scan  
 Yes - by V/Q scan (or other modality)  
 No, the diagnosis was based on clinical suspicion only

What was the location of the pulmonary embolism?

- Proximal (lobar or segmental pulmonary vessels)  
 Distal (subsegmental pulmonary vessels)  
 Both proximal and distal

Date of stroke

Do not enter any dates prior to ICU Day1; if the stroke started prior to ICU Day1 and was still present on ICU Day1, enter the ICU Day1 date

\_\_\_\_\_

Was the stroke confirmed on brain imaging?

- Yes  
 No

Date HIT developed

Do not enter any dates prior to ICU Day1; if the HIT started prior to ICU Day1 and was still present on ICU Day1, enter the ICU Day1 date

\_\_\_\_\_

Thromboembolic event(s) in association with HIT?

- Yes  
 No

Enter the thromboembolic event(s) in association with HIT?

\_\_\_\_\_

---

Date of other thromboembolic event  
Do not enter any dates prior to ICU Day1; if the other thromboembolic event started prior to ICU Day1 and was still present on ICU Day1, enter the ICU Day1 date

---

---

New coagulopathy in the first 14 days following ICU admission  
-Defined as INR>2 or PTT>40 in the absence of therapeutic anticoagulation  
-If the patient was receiving therapeutic anticoagulation, select "no"

Yes  
 No

---

Date coagulopathy developed  
Do not enter any dates prior to ICU Day1; if the coagulopathy started prior to ICU Day1 and was still present on ICU Day1, enter the ICU Day1 date

---

---

Peak PTT (seconds) in the absence of therapeutic anticoagulation  
If none available, enter "N/A"

---

---

Upper reference limit of normal for PTT (seconds) at your hospital's lab

---

---

Peak INR in the absence of therapeutic anticoagulation  
If none available, enter "N/A"

---

---

New disseminated intravascular coagulation (DIC) in the first 14 days following ICU admission?

Yes  
 No

---

Date DIC developed  
Do not enter any dates prior to ICU Day1; if the DIC started prior to ICU Day1 and was still present on ICU Day1, enter the ICU Day1 date

---

New major bleed in the first 14 days following ICU admission?

- Yes  
 No

Defined as bleeding in a critical area or organ (e.g., intracranial, retroperitoneal, pericardial, or intramuscular bleeding with compartment syndrome) or bleeding requiring a procedural intervention (e.g., EGD or IR embolization). "Requiring" a procedural intervention could include situations where an intervention would regularly be performed, but was not actually performed because the patient was too unstable, or because of logistical/other concerns related to COVID-19.

Blood transfusion alone does not qualify as an intervention.

Date major bleed occurred

Do not enter any dates prior to ICU Day1; if the major bleed started prior to ICU Day1 and was still present on ICU Day1, enter the ICU Day1 date

\_\_\_\_\_

Did the major bleed occur in the presence of therapeutic anticoagulation?

- Yes  
 No

Do not include DVT prophylaxis (e.g., unfractionated heparin 5,000 units SC or lovenox 30-40 mg SC)

Did the major bleed occur in the presence of prophylactic- or intermediate-dose anticoagulation received within 24 hours prior to the bleed?

- Yes - prophylactic dose anticoagulation  
 Yes - intermediate-dose anticoagulation  
 No

Prophylactic dose anticoagulation includes subcutaneous unfractionated heparin, enoxaparin (LMWH) 30-40mg once daily, or dalteparin 5,000 units once daily  
Intermediate-dose anticoagulation refers to enoxaparin (LMWH) 30-40 mg twice daily or dalteparin 5,000 units twice daily

Did the major bleed occur in the presence of any of the following antiplatelet agents received within 24 hours prior to the bleed? (select all that apply)

- Aspirin  
 Clopidogrel (Plavix)  
 Prasugrel  
 Ticagrelor  
 Ticlopidine  
 None

Location of major bleeding event(s) (select all that apply)

- Bronchopulmonary  
 Pleural  
 Pericardial  
 Peritoneal  
 Retroperitoneal  
 Central nervous system  
 Gastrointestinal  
 Genitourinary  
 Musculoskeletal and soft tissue  
 Other

---

Enter the other location of the major bleed

---

---

PT (seconds) within 24 hours prior to the major bleed  
-If more than one value is available within 24 hours  
prior to the bleed, use the value closest to and  
prior to the bleed  
-If unavailable, enter, "N/A"

---

---

PTT (seconds) within 24 hours prior to the major  
bleed  
-If more than one value is available within 24 hours  
prior to the bleed, use the value closest to and  
prior to the bleed  
-If unavailable, enter, "N/A"

---

---

INR within 24 hours prior to the major bleed  
-If more than one value is available within 24 hours  
prior to the bleed, use the value closest to and  
prior to the bleed  
-If unavailable, enter, "N/A"

---

---

Did the patient require transfusion of packed red  
blood cells (pRBCs) for the major bleed?  
-Enter the total number of units of pRBCs received  
within 48 hours following the bleed  
-If no pRBCs were transfused, enter "0"

---

---

Was a procedure or invasive intervention required to  
stop the major bleed? (e.g., endoscopy,  
interventional radiology, or surgery)?

Yes  
 No

---

Was the major bleed clearly fatal, an important  
contributor to death, or a factor in the decision to  
withdraw care?

Yes  
 No

---

Additional Notes (if any)

---

# Medications and Clinical Trials

**The questions below refer to the first 14 days following ICU admission. Even if the patient was in the ICU for less than 14 days and was transferred to the hospital floor, continue to enter data for the full 14 days or until discharged from the hospital (whichever occurs first)**

Antibiotics, antivirals, and antimalarials received at any time within 14 days following ICU admission (check all that apply)

-Only include meds received as part of a clinical trial if the patient definitely received the med (e.g., if they were in an open-label trial of chloroquine, or even a randomized double-blind trial of chloroquine at dose X versus chloroquine at dose Y, select chloroquine; however, if the patient was in a randomized, double-blind study of chloroquine versus placebo, do not select chloroquine)

- Chloroquine
- Hydroxychloroquine
- Azithromycin
- Remdesivir
- Ribavirin
- Lopinavir/ritonavir (Kaletra)
- Other antiviral\*
- None of the above

\*This only refers to other antivirals, not other antibiotics. We are not collecting data on antibiotics other than the ones on the checklist (chloroquine, hydroxychloroquine, and azithromycin)

Enter the date chloroquine was initiated  
If initiated prior to ICU Day1, enter the date for ICU Day1

---

Enter the date hydroxychloroquine was initiated  
If initiated prior to ICU Day1, enter the date for ICU Day1

---

Enter the date azithromycin was initiated  
If initiated prior to ICU Day1, enter the date for ICU Day1

---

Enter the date remdesivir was initiated  
If initiated prior to ICU Day1, enter the date for ICU Day1

---

Enter the date ribavirin was initiated  
If initiated prior to ICU Day1, enter the date for ICU Day1

---

Enter the date lopinavir/ritonavir (Kaletra) was initiated  
If initiated prior to ICU Day1, enter the date for ICU Day1

---

Enter the other antiviral

---

---

Enter the date the other antiviral was initiated  
If initiated prior to ICU Day1, enter the date for  
ICU Day1

---

Anti-inflammatory medications received at any time  
within 14 days following ICU admission (check all  
that apply)  
Include meds received as part of a clinical trial as  
long as the patient definitely received the med  
(i.e., do not include drug "X" if the patient was in  
a randomized, double-blind study of drug "X" versus  
placebo)

Do not include acetaminophen (Tylenol) as an "other  
anti-inflammatory" agent

- Corticosteroid
- NSAID
- Aspirin
- Statin
- Tocilizumab (Actemra)
- Other IL-6 antagonist
- Other anti-inflammatory
- Vitamin C (IV or PO)
- None of the above

---

Enter the name and initial cumulative daily dose of  
the corticosteroid  
For example, if a patient was started on  
methylprednisolone 125mg twice per day, enter,  
"methylprednisolone 250 mg"

---

---

Enter the date the corticosteroid was initiated  
If initiated prior to ICU Day1, enter the date for  
ICU Day1

---

---

Enter the date the NSAID was initiated  
If initiated prior to ICU Day1, enter the date for  
ICU Day1

---

---

Enter the date the aspirin was initiated  
If initiated prior to ICU Day1, enter the date for  
ICU Day1

---

---

Enter the date the statin was initiated  
If initiated prior to ICU Day1, enter the date for  
ICU Day1

---

---

Enter the date the tocilizumab was initiated  
If initiated prior to ICU Day1, enter the date for  
ICU Day1

---

---

Enter the date the other IL-6 antagonist was  
initiated  
If initiated prior to ICU Day1, enter the date for  
ICU Day1

---

---

Enter the other anti-inflammatory medication

---



Enter the date the other anti-inflammatory medication was initiated  
If initiated prior to ICU Day1, enter the date for ICU Day1

---

Enter the date the vitamin C was initiated  
If initiated prior to ICU Day1, enter the date for ICU Day1

---

ARDS/hypoxemia-specific medications/interventions received at any time within 14 days following ICU admission (check all that apply)  
\*Includes cisatracurium (Nimbex) and others, but do not include short acting paralytics (e.g., rocuronium) used only for induction of intubation

- Neuromuscular blockade\*  
 Inhaled epoprostenol (Veletri or Flolan)  
 Inhaled nitric oxide (iNO)  
 Proned position  
 None of the above

Enter the date the neuromuscular blockade was initiated  
If initiated prior to ICU Day1, enter the date for ICU Day1

---

Enter the date inhaled epoprostenol (Veletri or Flolan) was initiated  
If initiated prior to ICU Day1, enter the date for ICU Day1

---

Enter the date the inhaled nitric oxide (iNO) was initiated  
If initiated prior to ICU Day1, enter the date for ICU Day1

---

Enter the date the patient was first proned

---

Other medications received at any time within 14 days following ICU admission (check all that apply)  
Include meds received as part of a clinical trial as long as the patient definitely received the med

- Convalescent serum  
 ACE-I\*  
 ARB\*  
 tissue Plasminogen Activator (tPA)\*\*  
 None of the above

\*ACE-Is include lisinopril, fosinopril, captopril, and others  
\*ARBs include losartan, valsartan, irbesartan, and others  
\*\*Systemic tPA only (does not apply to tPA infused into indwelling catheters or locally delivered intra-arterial tPA used for stroke)

Enter the date the convalescent serum was initiated  
If initiated prior to ICU Day1, enter the date for ICU Day1

---

Enter the date the ACE-I was initiated  
If initiated prior to ICU Day1, enter the date for  
ICU Day1 \_\_\_\_\_

Enter the date the ARB was initiated  
If initiated prior to ICU Day1, enter the date for  
ICU Day1 \_\_\_\_\_

Enter the date the tPA was initiated  
If initiated prior to ICU Day1, enter the date for  
ICU Day1 \_\_\_\_\_

Therapeutic anticoagulation received at any time  
within 14 days following ICU admission?  
Do not include DVT prophylaxis (e.g., unfractionated  
heparin 5,000 units SC or lovenox 30-40 mg SC)

- Yes  
 No

In patients receiving anticoagulation prior to ICU or  
hospital admission, continuation of this  
anticoagulation or conversion to an alternative  
therapeutic type means the answer to this question  
is, "Yes", and the date entered for anticoagulation  
initiation (for the following question) should be  
the date of ICU admission. Therapeutic  
anticoagulation includes any of the following  
categories:

1) Continuous drips (infusions) of heparin,  
argatroban, or bivalirudin

2) Subcutaneous regimens:  
Enoxaparin (Lovenox) 1mg/kg twice per day  
Enoxaparin (Lovenox) 1.5mg/kg once per day  
Dalteparin (Fragmin) 150-200 units/kg once per day  
Dalteparin (Fragmin) 100 units/kg twice per day  
Fondaparinux (Aristra) at doses of 5mg or more daily

3) Oral anticoagulants: warfarin (Coumadin), apixaban  
(Eliquis), rivaroxaban (Xarelto), edoxaban, or  
dabigatran (Pradaxa)

Anticoagulation type

- Heparin drip  
 Therapeutic enoxaparin (Lovenox)  
 Bivalirudin (Angiomax)  
 Argatroban  
 Other

Enter the date therapeutic anticoagulation was  
started \_\_\_\_\_  
If already on therapeutic anticoagulation on arrival  
to the ICU, enter the date of ICU admission here

Enter the indication(s) for anticoagulation (select all that apply)

- Atrial fibrillation/flutter  
 Acute coronary syndrome/myocardial infarction  
 DVT/PE  
 For extracorporeal circuit (e.g., ECMO or RRT)  
 Hypercoagulable state associated with COVID-19  
 Other

Enrolled in a clinical trial for COVID-19?  
Includes not only clinical trials of medications but any clinical trial, including devices or other interventions

- Yes  
 No

Enter the ClinicalTrials.gov Identifier, if known (otherwise enter, "N/A")

-The identifier always begins with "NCT", followed by several digits (e.g., NCT12345678). Enter the entire identifier, including the "NCT". The identifier can be easily found at the top of the ClinicalTrials.gov website for the trial

-FYI, the ClinicalTrials.gov webpage for the trial is a good resource to answer the subsequent questions about study design

\_\_\_\_\_

Was the trial single-arm?  
One intervention only, with no active comparator group

- Yes  
 No

What intervention did the patient receive?  
Be as specific as possible (e.g., drug X at X mg BID for X days)

\_\_\_\_\_

What intervention(s) did the patient receive? Or, if unknown, what interventions were being tested?  
-Be as specific as possible (e.g., drug X at X mg BID for X days versus drug Y; or drug X versus placebo)  
-Include details on study design, including whether the study was randomized, double-blinded, and placebo-controlled

\_\_\_\_\_

Was the patient enrolled in a second clinical trial?

- Yes  
 No

Enter the details of the second clinical trial  
Include if the trial was single- versus double-arm, if it was randomized, double-blinded, and/or placebo-controlled, and what the intervention(s) were

\_\_\_\_\_

Additional notes (if any)

Do not use this space to write about meds that were not asked about above

\_\_\_\_\_

# Mortality and Length of Stay

Discharged from the ICU?

-If the patient died in the ICU, select "no"

-Enter the date the patient was first discharged from the ICU, even if they were subsequently readmitted back to the ICU

- Yes  
 No  
 N/A because the patient was in a non-ICU bed converted into an ICU bed for surge capacity, and these patients typically do not get transferred. They either die or are discharged home directly from the "non-ICU" bed

Date of discharge from the ICU

\_\_\_\_\_

Hospital mortality status

- Survived and discharged from the hospital  
 Died during hospitalization  
 Patient is still hospitalized at the time of data entry

Date of death

\_\_\_\_\_

Cause(s) of death (select all that apply)

- ARDS/respiratory failure  
 Heart failure  
 Septic shock  
 Kidney failure  
 Liver failure  
 Other

Enter the other cause(s) of death

-Do not simply write, "cardiopulmonary arrest" or "Comfort Measures Only". Rather, provide the immediate underlying cause(s) of death in addition to those already listed above (e.g., pulmonary embolism, stroke, etc.)

-Would also mention here if the patient needed life-sustaining therapy (e.g., mechanical ventilation, RRT) but that it was unavailable due to shortages

\_\_\_\_\_

Date of last follow-up

\_\_\_\_\_

Date discharged from the hospital

\_\_\_\_\_

Additional Notes (if any)

Do NOT use this space to write about the cause of death. Cause of death should be provided above. Also, do not provide details about DNR/DNI status, comfort measures only, family meetings, etc.

\_\_\_\_\_

## Additional Lab Data

**The questions below refer to the first 14 days following ICU admission. Even if the patient was in the ICU for less than 14 days and was transferred to the hospital floor, continue to enter data for the full 14 days or until discharged from the hospital (whichever occurs first)**

Blood Type

- A+
- A-
- B+
- B-
- AB+
- AB-
- O+
- O-
- Unknown

Serum creatinine (mg/dl) on hospital discharge  
If none available on the day of hospital discharge,  
enter the value closest to hospital discharge

---

Dialysis-dependent on hospital discharge?

- Yes - from AKI
- Yes - from ESRD
- No

Did the patient have a kidney biopsy performed?

- Yes
- No

Copy and paste the entire biopsy report  
Be sure to remove identifiers, like name and MRN

---

## Additional Data for ECMO Patients

This instrument is only meant for patients who initiated ECMO in the first 14 days following ICU admission. If the patient did not initiate ECMO in the first 14 days, no questions will appear below, and you may skip this section.

Was sodium bicarbonate administered intravenously (either as a drip or bolus infusion) within 24 hours prior to ECMO cannulation?  Yes  No

History of CNS dysfunction within 30 days prior to ECMO cannulation?  Yes  No  
Defined as neurotrauma, stroke, encephalopathy/altered mental status, or seizure

Was peak inspiratory pressure on the ventilator  $\geq 42$  cm H<sub>2</sub>O at any time during the 48 hours prior to ECMO cannulation?  Yes  No

Select the mode of mechanical ventilation documented closest to, but no more than 24 hours prior to ECMO cannulation  Volume control  Pressure control  SIMV  APRV  HFOV

Enter the tidal volume (mL) immediately prior to ECMO cannulation \_\_\_\_\_

Enter the respiratory rate (per minute) immediately prior to ECMO cannulation \_\_\_\_\_  
Enter the respiratory rate set on the mechanical ventilator, which not may not necessarily be the same as the patient's actual respiratory rate

Enter the plateau pressure (cm H<sub>2</sub>O) immediately prior to ECMO cannulation \_\_\_\_\_  
If not available, enter "N/A"

What was the PCO<sub>2</sub> on the arterial blood gas immediately prior to ECMO cannulation? \_\_\_\_\_  
-Do not enter values from more than 24 hours prior to ECMO cannulation  
-If none available, enter "N/A"

---

Select the earliest documented mode of mechanical ventilation on postoperative day 1 after ECMO cannulation  
Postoperative day 1 is defined as the next day (starting at midnight) after ECMO cannulation

- Volume control  
 Pressure control  
 SIMV  
 APRV  
 HFOV

---

Enter the earliest documented tidal volume (mL) on postoperative day 1 after ECMO cannulation  
Postoperative day 1 is defined as the next day (starting at midnight) after ECMO cannulation

---

---

Enter the earliest documented respiratory rate (per minute) on postoperative day 1 after ECMO cannulation  
-Postoperative day 1 is defined as the next day (starting at midnight) after ECMO cannulation  
-Enter the respiratory rate set on the mechanical ventilator, which not may not necessarily be the same as the patient's actual respiratory rate

---

---

Enter the earliest documented plateau pressure (cm H<sub>2</sub>O) on postoperative day 1 after ECMO cannulation  
-Postoperative day 1 is defined as the next day (starting at midnight) after ECMO cannulation  
-If not available, enter "N/A"

---

---

What was the PCO<sub>2</sub> on the first arterial blood gas on postoperative day 1 after ECMO cannulation?  
-Postoperative day 1 is defined as the next day (starting at midnight) after ECMO cannulation  
-If none available, enter "N/A"

---

---

Enter the earliest documented ECMO circuit blood flow (in liters per minute, LPM) on postoperative day 1 after ECMO cannulation  
-Postoperative day 1 is defined as the next day (starting at midnight) after ECMO cannulation  
-If not available, enter "N/A"

---

---

Was the ECMO successfully decannulated (removed) during the first 28 days following ICU admission?  
If the ECMO was decannulated for palliative purposes, select "no"

- Yes  
 No

---

Date ECMO was decannulated

---

---

Successfully liberated from ventilator?  Yes  
Defined as off the ventilator for at least 24 hours.  No  
If palliatively extubated, select "no"

---

Date liberated from ventilator \_\_\_\_\_

---

Did the patient develop a pneumothorax requiring chest tube placement at anytime following ECMO cannulation?  Yes  
 No

---

Date of pneumothorax requiring chest tube placement \_\_\_\_\_

---

New thromboembolic event in the 15-28 days following ICU admission (select all that apply)  
-Note, this question is limited to days 15-28 following ICU admission because the same question has already been asked on an earlier instrument for days 1-14

- Deep venous thrombosis (DVT)
- Pulmonary embolism (PE)
- Stroke
- Heparin-induced thrombocytopenia (H.I.T.)
- Other thromboembolic event
- None of the above

---

Date of DVT \_\_\_\_\_

---

Date of pulmonary embolism \_\_\_\_\_

---

Date of stroke \_\_\_\_\_

---

Date of Heparin-induced thrombocytopenia (H.I.T.) \_\_\_\_\_

---

Date of other thromboembolic event \_\_\_\_\_

---

Enter the other thromboembolic event \_\_\_\_\_



---

New major bleed in the first 15-28 days following ICU admission?

- Yes  
 No

-Note, this question is limited to days 15-28 following ICU admission because the same question has already been asked on an earlier instrument for days 1-14.

Defined as bleeding in a critical area or organ (e.g., intracranial, retroperitoneal, pericardial, or intramuscular bleeding with compartment syndrome) or bleeding requiring a procedural intervention (e.g., EGD or IR embolization). "Requiring" a procedural intervention could include situations where an intervention would regularly be performed, but was not actually performed because the patient was too unstable, or because of logistical/other concerns related to COVID-19.

Blood transfusion alone does not qualify as an intervention.

---

Date major bleed occurred

---

---

Location of major bleeding event(s) (select all that apply)

- Bronchopulmonary  
 Pleural  
 Pericardial  
 Peritoneal  
 Retroperitoneal  
 Central nervous system  
 Gastrointestinal  
 Genitourinary  
 Musculoskeletal and soft tissue  
 Other

---

New infection on days 15 to 28 following ICU admission?

- Yes  
 No

-Note, this question is limited to days 15-28 following ICU admission because the same question has already been asked on an earlier instrument for days 1-14.

Defined as a suspected or confirmed new infection other than COVID-19.

Should be primarily based on culture data (e.g., sputum, blood, urine, and stool), though other infections can also be included (e.g., cellulitis, abscess) if there was a strong clinical suspicion, even in the absence of positive cultures

---

Date new infection occurred

---

---

What infection(s)?

- Pneumonia (including ventilator-associated pneumonia)
- Urosepsis
- Biliary sepsis
- Bacteremia
- Other

---

Requirement for new renal replacement therapy (dialysis) at any time on days 15-28 following ICU admission?

- Yes
- No

-Note, this question is limited to days 15-28 following ICU admission because the same question has already been asked on an earlier instrument for days 1-14.

-Only answer "yes" if the patient required new renal replacement therapy on any of days 15-28 and did NOT require it on days 1-14.

---

Date renal replacement therapy initiated

---
